# Supplementary material
Source: Royal Society of Chemistry journal article supplement (doi:10.1039/d6qi00523c)
Supplement: d6qi00523c1.pdf [file d6qi00523c1.pdf]

## SUPPLEMENTARY INFORMATION

for

### **From Actinide Bonding to Extraction Performance: Trends in An(IV) N-Heterocyclic Diamide Complexes**

Anna D. Krot<sup>\*1,2</sup>, Mikhail A. Gerasimov<sup>1</sup>, Nataliya E. Borisova<sup>1</sup>, Daniil M. Ivanov<sup>3</sup>, Maria R. Subbotina<sup>3</sup>, Paulina Kalle<sup>4</sup>, Vladislav E. Sharov<sup>2</sup>, Alina A. Sivolap<sup>2</sup>, Mikhail S. Grigoriev<sup>2</sup>, Mariia V. Evsiunina<sup>1</sup>, Anastasiia A. Smirnova<sup>1</sup>, Alexander M. Fedoseev<sup>2</sup>, Petr I. Matveev<sup>\*1</sup>

<sup>1</sup>*Department of Chemistry, Lomonosov Moscow State University, Leninskiye Gory, 1 build. 3, 119991 Moscow, Russia*

<sup>2</sup>*Frumkin Institute of Physical Chemistry and Electrochemistry, Russian Academy of Sciences, 31-4, Leninsky prospect, 119071 Moscow, Russia*

<sup>3</sup>*Institute of Chemistry, Saint Petersburg State University, Universitetskaya Nab. 7/9, 199034 Saint Petersburg, Russian Federation*

<sup>4</sup>*Kurnakov Institute of General and Inorganic Chemistry, Russian Academy of Sciences, Leninsky prospect, 31, 119071 Moscow, Russia*

Correspondence: [anna.d.krot@gmail.com](mailto:anna.d.krot@gmail.com); [petr.i.matveev@gmail.com](mailto:petr.i.matveev@gmail.com)

## Table of Contents

|     |                                                              |    |
|-----|--------------------------------------------------------------|----|
| 1   | Experimental part .....                                      | 2  |
| 1.1 | Extraction experiments and preparation of the crystals.....  | 2  |
| 1.2 | Single crystal X-ray diffraction.....                        | 2  |
| 1.3 | ICP-MS.....                                                  | 3  |
| 1.4 | <sup>1</sup> H-NMR sample preparation and measurements ..... | 3  |
| 1.5 | UV-vis spectroscopy .....                                    | 3  |
| 1.6 | IR spectroscopy .....                                        | 3  |
| 1.7 | Computational methodology .....                              | 4  |
| 2   | Crystal Data .....                                           | 4  |
| 3   | Computational part.....                                      | 8  |
| 4   | UV-vis data .....                                            | 11 |
| 5   | <sup>1</sup> H-NMR data .....                                | 12 |
| 6   | Solvent extraction .....                                     | 27 |
| 7   | References .....                                             | 27 |

## 1 Experimental part

*Caution! Th and U are toxic heavy metals;  $^{237}\text{Np}$  and  $^{239}\text{Pu}$  are dangerous alpha-emitters ( $T_{1/2} = 2 \cdot 10^6$  y and 24000 y, respectively). All manipulations were conducted in specialized facilities, following strict safety protocols.*

### 1.1 Extraction experiments and preparation of the crystals

All purchased chemicals used in this study were of analytical grade and used without any further purification. All aqueous acidic solutions were prepared from deionized water (MilliPore Simplicity) and concentrated acid (analytical grade, Chimmed Group). N,N'-diethyl-N,N'-di(4-ethyl-phenyl)-diamide of 2,2'-dipyridyl-6,6'-dicarboxylic acid ( $^{4\text{Et}}\text{DABipy}$ ) was prepared, purified, and characterized according to the published procedure<sup>1</sup>. Metanitrobenzotrifluoride (F-3) (OJSC "PIM-INVEST", >99%), acetonitrile (ACCROS, HPLC grade),  $\text{CsNO}_3$  (Sigma-Aldrich, 99.9%),  $\text{Ce}(\text{NO}_3)_3 \cdot 6\text{H}_2\text{O}$  (Sigma-Aldrich, 99.9%),  $(\text{NH}_4)_2\text{Ce}(\text{NO}_3)_6$  (Sigma-Aldrich, 99.9%),  $\text{Th}(\text{NO}_3)_4 \cdot 5\text{H}_2\text{O}$  (natural isotopic ratio),  $\text{UO}_2(\text{NO}_3)_2 \cdot 6\text{H}_2\text{O}$  (natural isotopic ratio),  $^{237}\text{NpO}_2$ ,  $^{239}\text{PuO}_2$  (Company "Isotope") were used. Deuterated solvents  $\text{CH}_3\text{CN-d}_3$  and  $(\text{CH}_3)_2\text{SO-d}_6$  for NMR spectra registration were purchased from commercial sources and used without further purification.

$\text{Cs}_2\text{An}(\text{NO}_3)_6$  (An = U, Np, Pu) precursors were prepared as follows. U(IV) solution (1 M) in 3 M  $\text{HNO}_3$  was prepared by controlled potential electrolysis at the mercury pool cathode; Np(IV) and Pu(IV) in 5-7 M  $\text{HNO}_3$  were prepared by reducing with hydrazine at 50 – 60°C. A saturated solution of  $\text{CsNO}_3$  in 5-7 M  $\text{HNO}_3$  was added to a solution of 0.5 – 1 M An(IV) in 5 – 7 M  $\text{HNO}_3$  until the Cs:An molar ratio reached 3:1. The solution was stored at 6°C for at least 3 hours. Crystals of  $\text{Cs}_2\text{An}(\text{NO}_3)_6$  were then filtered, washed thrice with cold (6°C) 3 M  $\text{HNO}_3$  solution and dried in air.

Starting solutions of 0.1 M Th(IV), 0.1 M U(IV) and 0.025 M Pu(IV) were prepared by dissolving of  $\text{Th}(\text{NO}_3)_4 \cdot 5\text{H}_2\text{O}$  and  $\text{Cs}_2\text{An}(\text{NO}_3)_6$  (An = U, Pu) in 1 M  $\text{HNO}_3$ . In case of U(IV), 0.25 M  $\text{N}_2\text{H}_4 \cdot \text{HNO}_3$  was added to prevent oxidation. Np(IV) was prepared from  $^{237}\text{Np}$  stock solution in  $\text{HNO}_3$ . Neptunium was reduced to Np(IV) by adding an excess amount of  $\text{NH}_2\text{OH} \cdot \text{HCl}$  and heating to 70°C for nearly 4 h. The resulting solution of Np(IV) was diluted with 1 M  $\text{HNO}_3$  and UV-vis spectrum was recorded to ensure that other oxidation states of neptunium are absent. Np(IV) concentration was calculated from the absorption at 961 nm to be 0.05 M. Starting solutions of 0.01 M Ce(III), Ce(IV) and U(VI) were prepared by dissolving  $\text{Ce}(\text{NO}_3)_3 \cdot 6\text{H}_2\text{O}$ ,  $(\text{NH}_4)_2\text{Ce}(\text{NO}_3)_6$  and  $\text{UO}_2(\text{NO}_3)_2 \cdot 6\text{H}_2\text{O}$  in 0.5 M  $\text{HNO}_3$ . All the extraction experiments were repeated twice to ensure convergent result.

Extraction experiments were conducted in the polyethylene tubes with organic to aqueous phase ratio of 1:1 (each phase volume equaled 500  $\mu\text{l}$ ). For all experiments, initial cation concentration in the aqueous phase was close to 0.025 mM,  $\text{HNO}_3$  concentration varied from 0.5 M to 5 M. Organic phase consisted of  $^{4\text{Et}}\text{DABipy}$  solution in F-3 (metanitrobenzotrifluoride, Figure 1b) with  $^{4\text{Et}}\text{DABipy}$  concentration from 2.5 mM to 50 mM. Phases were contacted at  $22 \pm 2^\circ\text{C}$  using Vortex-shaker. Phases were then centrifuged for 1.5 min at 10000 rpm. Ce, Th and U concentration in the aqueous phase after contact was measured using inductively coupled plasma mass spectrometry (ICP-MS). Np and Pu concentrations were measured in aqueous phase by liquid scintillation counting using a PerkinElmer Tricarb 2810 TR Liquid Scintillation Analyzer. Alpha-beta discrimination was implied to distinguish counts attributed to  $^{237}\text{Np}$  and  $^{233}\text{Pa}$ . Samples were prepared by mixing 200  $\mu\text{l}$  of the aqueous phase after extraction, 500  $\mu\text{l}$  of distilled water and 3 ml of scintillation

cocktail (Ultima Gold). Distribution coefficients were calculated as the ratio of the difference in metal concentration between the initial and equilibrium aqueous phases, divided by the concentration of the metal in the equilibrium aqueous phase.

Single crystals of  $[(^{4\text{Et}}\text{DABipy})\text{Ce}(\text{NO}_3)_3] \cdot [(^{4\text{Et}}\text{DABipy})\text{Ce}(\text{NO}_3)_4]$ ,  $[(^{4\text{Et}}\text{DABipy})\text{An}(\text{NO}_3)_4]$  suitable for SC-XRD analysis were synthesized by isothermal evaporation of the solvent from concentrated solutions of  $^{4\text{Et}}\text{DABipy}$  and the corresponding metal nitrate salt ( $(\text{NH}_4)_2\text{Ce}(\text{NO}_3)_6$ ,  $\text{Th}(\text{NO}_3)_4$ ,  $\text{Cs}_2\text{An}(\text{NO}_3)_6$  (An = U, Np, Pu) in acetonitrile.

## 1.2 Single crystal X-ray diffraction

Crystallographic data for  $[(^{4\text{Et}}\text{DABipy})\text{Ce}(\text{NO}_3)_3] \cdot [(^{4\text{Et}}\text{DABipy})\text{Ce}(\text{NO}_3)_4]$ ,  $[(^{4\text{Et}}\text{DABipy})\text{Th}(\text{NO}_3)_4]$ , and  $[(^{4\text{Et}}\text{DABipy})\text{U}(\text{NO}_3)_4]$  were collected on a Bruker D8 Venture diffractometer using graphite monochromatized  $\text{MoK}\alpha$  radiation ( $\lambda = 0.71073 \text{ \AA}$ ) in  $\omega$ -scan mode at 100 or 150 K. The data for  $[(^{4\text{Et}}\text{DABipy})\text{Np}(\text{NO}_3)_4]$  and  $[(^{4\text{Et}}\text{DABipy})\text{Pu}(\text{NO}_3)_4]$  were collected on a Bruker Kappa APEX II diffractometer with a CCD area detector using graphite-monochromatized  $\text{MoK}\alpha$  ( $\lambda = 0.71073 \text{ \AA}$ ) radiation at 100 K.

Cell refinement and data reduction were conducted using the software SAINT (V8.38A, Bruker). Absorption correction based on measurements of equivalent reflections was applied (SADABS-2016/2, Bruker 2016/2). The structures were solved by direct methods (SHELXT 2018/2)<sup>2</sup> and refined by full matrix least-squares on  $F^2$  (SHELXL 2018/3)<sup>3</sup> with anisotropic displacement parameters for all non-hydrogen atoms. Hydrogen atoms were placed in calculated positions and refined using a riding model. In the structure of cerium complex, disordered solvent molecules (acetonitrile) could not be modeled and a solvent mask was calculated as implemented in Olex2-1.5 to account for the electron density<sup>4</sup>.

## 1.3 ICP-MS

The quantitative determination of  $^{140}\text{Ce}$ ,  $^{232}\text{Th}$  and  $^{238}\text{U}$  was performed using ICP-MS by PlasmaQuant MS Elite (Analytic Jena, Germany). All samples were diluted with the 3% nitric acid solution to concentrations within the calibration range. The dilution solution was prepared using ultra-high purity  $\text{HNO}_3$  and deionized water obtained from a Milli-Q water purification system (resistivity  $18.2 \text{ M}\Omega\cdot\text{cm}$ ). Calibration range was 0.1 – 100  $\mu\text{g/L}$ . For signal correction and matrix effect compensation, an internal standard with  $^{103}\text{Rh}$  was used.

Solvent extraction experiments with  $\text{Th}^{4+}$  and  $\text{U}^{4+}$  were repeated and remeasured at Agilent 7500 ce instrument following similar sample preparation procedure. The cross-validation yielded comparable results.

## 1.4 $^1\text{H-NMR}$ sample preparation and measurements

Two sets of samples were prepared for  $^1\text{H-NMR}$  analysis. One set consisted of a series of solutions containing  $\text{Ce}^{3+/4+}$  and  $\text{An}^{4+}$  (An = Th, U, Np, Pu) complexes with  $^{4\text{Et}}\text{DABipy}$  in acetonitrile- $d_3$ . The samples were prepared by mixing acetonitrile- $d_3$  solutions of  $^{4\text{Et}}\text{DABipy}$  and the corresponding metal salt. In case of  $\text{U}^{4+}$ ,  $\text{N}_2\text{H}_4\cdot\text{H}_2\text{O}$  was added to the solvent prior to  $\text{Cs}_2\text{U}(\text{NO}_3)_6$  dissolution. The second set of samples was prepared by extracting  $\text{An}^{4+}$  cations from 3 M  $\text{HNO}_3$  to 0.01 M  $^{4\text{Et}}\text{DABipy}$  in F-3. NMR spectrometer was calibrated using  $\text{DMSO-}d_6$ , which was placed in the inner capillary of the ampule.

The NMR spectra were measured with a BRUKER AVANCE-600 MHz NMR spectrometer at  $298\pm 0.3\text{K}$  in 5 mm probe tubes (with the solvents as internal reference). For experiments with F-3 used as solvent, capillary filled with  $\text{DMSO-}d_6$  was placed inside the probe tube. The 2D homonuclear shift correlation using gradient pulse for selection experiments were made for protons assignment.

## 1.5 UV-vis spectroscopy

UV-vis spectra of the initial aqueous phases, acetonitrile solutions after  $^1\text{H-NMR}$  experiments and of organic phases after extraction were recorded using Shimadzu UV 1800 spectrometer at  $298.0 \pm 0.1$  K in quartz cuvettes. The scanning range was 750 – 400 nm for U, 1100 – 400 nm for Np and 850 – 400 nm Pu for samples.

As reference of 12-coordinate An(IV) species,  $[\text{N}(\text{CH}_3)_4]_2\text{An}^{\text{IV}}(\text{NO}_3)_6$  ( $\text{An}^{\text{IV}} = \text{U}, \text{Np}, \text{Pu}$ ) complexes were prepared by adding a solution of  $[\text{N}(\text{CH}_3)_4]\text{NO}_3$  (2 equivalents) in 4 M  $\text{HNO}_3$  to An(IV) solutions in 4 M  $\text{HNO}_3$  (1 equivalent). The solutions were left overnight at  $4^\circ\text{C}$  for precipitation. The precipitates were washed twice with 3 M  $\text{HNO}_3$ , dried under vacuum and then dissolved in acetonitrile. Chemical identity of the complexes was confirmed by comparison of the obtained UV-vis spectra with literature data, namely  $[(\text{C}_2\text{H}_5)_4]_2\text{An}(\text{NO}_3)_6$  ( $\text{An} = \text{U}, \text{Np}, \text{Pu}$ )<sup>5</sup> and  $[\text{N}(\text{n-Bu}_4)]_2\text{Pu}(\text{NO}_3)_6$ .<sup>6</sup>

## 1.6 IR spectroscopy

Infrared spectra of  $\text{Ce}^{3+}$ ,  $\text{Th}^{4+}$ ,  $\text{U}^{4+}$  and  $\text{Np}^{4+}$  crystals were measured using the FT-801 IR Fourier spectrometer (Simex, Russia). Crystals were mixed with calcined NaCl in a mass ratio of 1:100 and pressed into a thin pellet. IR data were recorded from the pellets in a range 500-2000  $\text{cm}^{-1}$ , with a spectral resolution of 4  $\text{cm}^{-1}$ . In total, 16 scans were recorded and averaged for each sample. IR spectra are presented in Figure S3. All spectra are identical, except for the 935  $\text{cm}^{-1}$  band of  $[(^4\text{EtDABipy})\text{U}(\text{NO}_3)_4]$  compound, which likely indicates that U(IV) was oxidized during sample preparation and the peak corresponds to  $\nu_3$  vibrations of  $\text{UO}_2^{2+}$ .

## 1.7 Computational methodology

Simplified starting models of Ce(IV), Th(IV), U(IV), Np(IV), and Pu(IV) complexes assigned as  $[(\text{DABipy})\text{M}(\text{NO}_3)_4]$ , where 4-EtC<sub>6</sub>H<sub>4</sub> substituents were replaced by Ph groups, were constructed based on X-ray data (see section 2.2), with hydrogen atoms placed in idealized positions accordingly to neutron diffraction statistics<sup>7</sup>. Further DFT calculations with full geometry optimization were performed in ORCA 5.0 program<sup>8</sup> using PBE0<sup>9</sup>-D3<sup>10</sup> functional with the Douglas–Kroll–Hess 2nd order scalar relativistic (DKH) calculations requested relativistic core Hamiltonian<sup>11,12</sup> and full-electron jorge-TZP-DKH<sup>13–15</sup> (for metals) and jorge-DZP-DKH<sup>15–18</sup> (for other elements) basis sets with the “resolution of identity” algorithm<sup>19</sup> in conjunction with the AutoAux-generated<sup>20</sup> auxiliary basis sets. The SCF calculations were tightly converged (TightSCF). In all cases, vibrational analysis showed no imaginary frequencies.

Bader topological analysis of electron density distributions<sup>21–23</sup> for all calculated wavefunctions as well as atoms-in-molecules (AIM)<sup>24–26</sup> charge calculations was performed in Multiwfn 3.8 program<sup>27,28</sup>. Wiberg bond indexes (WBI)<sup>29–31</sup> and natural population analysis (NPA)<sup>32,33</sup> atomic charges in natural atomic partitioning scheme were calculated using GENNBO utility in NBO 7.0<sup>34</sup> based on .47 files generated in Multiwfn 3.8.

## 2 Crystal Data

**Table S1.** Crystal data and structure refinement for Ce, Th and U complexes.

|                                                |                                                        |                                                       |                                                       |
|------------------------------------------------|--------------------------------------------------------|-------------------------------------------------------|-------------------------------------------------------|
| CCDC code                                      | 2534238                                                | 2534240                                               | 2534239                                               |
| Empirical formula                              | $C_{33.5}H_{36.06}CeN_{8.25}O_{12.5}$                  | $C_{32}H_{34}N_8O_{14}Th$                             | $C_{32}H_{34}N_8O_{14}U$                              |
| Formula weight                                 | 894.38                                                 | 986.71                                                | 992.70                                                |
| Temperature/K                                  | 100                                                    | 100                                                   | 150                                                   |
| Crystal system                                 | monoclinic                                             | monoclinic                                            | monoclinic                                            |
| Space group                                    | C2/c                                                   | P2 <sub>1</sub> /n                                    | C2/c                                                  |
| a/Å                                            | 51.7998(15)                                            | 11.9377(4)                                            | 51.3341(15)                                           |
| b/Å                                            | 16.5422(5)                                             | 24.7740(10)                                           | 8.5076(3)                                             |
| c/Å                                            | 18.0168(5)                                             | 13.5637(5)                                            | 17.5282(6)                                            |
| $\alpha/^\circ$                                | 90                                                     | 90                                                    | 90                                                    |
| $\beta/^\circ$                                 | 95.6060(10)                                            | 112.1650(10)                                          | 101.6010(10)                                          |
| $\gamma/^\circ$                                | 90                                                     | 90                                                    | 90                                                    |
| Volume/Å <sup>3</sup>                          | 15364.4(8)                                             | 3715.0(2)                                             | 7498.7(4)                                             |
| Z                                              | 16                                                     | 4                                                     | 8                                                     |
| $\rho_{calc}g/cm^3$                            | 1.547                                                  | 1.764                                                 | 1.759                                                 |
| $\mu/mm^{-1}$                                  | 1.258                                                  | 4.092                                                 | 4.406                                                 |
| F(000)                                         | 7245.0                                                 | 1936.0                                                | 3888.0                                                |
| Crystal size/mm <sup>3</sup>                   | 0.34 × 0.09 × 0.05                                     | 0.28 × 0.24 × 0.12                                    | 0.2 × 0.12 × 0.01                                     |
| Radiation                                      | MoK $\alpha$ ( $\lambda = 0.71073$ )                   | MoK $\alpha$ ( $\lambda = 0.71073$ )                  | MoK $\alpha$ ( $\lambda = 0.71073$ )                  |
| 2 $\theta$ range for data collection/ $^\circ$ | 2.586 to 55.842                                        | 3.636 to 55.994                                       | 4.696 to 56                                           |
| Reflections collected                          | 83195                                                  | 33895                                                 | 34027                                                 |
| Independent reflections                        | 18392 [ $R_{int} = 0.0731$ ,<br>$R_{sigma} = 0.0652$ ] | 8949 [ $R_{int} = 0.0352$ ,<br>$R_{sigma} = 0.0349$ ] | 9045 [ $R_{int} = 0.0449$ ,<br>$R_{sigma} = 0.0460$ ] |
| Data/restraints/parameters                     | 18392/8/982                                            | 8949/0/500                                            | 9045/0/500                                            |
| Goodness-of-fit on $F^2$                       | 1.057                                                  | 1.064                                                 | 1.100                                                 |
| Final R indexes [ $I \geq 2\sigma(I)$ ]        | $R_1 = 0.0423$ ,<br>$wR_2 = 0.0853$                    | $R_1 = 0.0347$ ,<br>$wR_2 = 0.0901$                   | $R_1 = 0.0350$ ,<br>$wR_2 = 0.0739$                   |
| Final R indexes [all data]                     | $R_1 = 0.0713$ ,<br>$wR_2 = 0.0935$                    | $R_1 = 0.0433$ ,<br>$wR_2 = 0.0936$                   | $R_1 = 0.0474$ ,<br>$wR_2 = 0.0776$                   |
| Largest diff. peak/hole / e Å <sup>-3</sup>    | 1.23/-1.57                                             | 1.68/-1.80                                            | 1.04/-1.77                                            |

**Table S2.** Crystal data and structure refinement for Np and Pu complexes.

|                   |                           |                           |
|-------------------|---------------------------|---------------------------|
| CCDC code         | 2534233                   | 2534234                   |
| Empirical formula | $C_{32}H_{34}N_8NpO_{14}$ | $C_{32}H_{34}N_8PuO_{14}$ |
| Formula weight    | 991.67                    | 996.67                    |
| Temperature/K     | 100                       | 100                       |
| Crystal system    | monoclinic                | monoclinic                |
| Space group       | C2/c                      | C2/c                      |

|                                             |                                                      |                                                             |
|---------------------------------------------|------------------------------------------------------|-------------------------------------------------------------|
| a/Å                                         | 51.287(16)                                           | 51.224(2)                                                   |
| b/Å                                         | 8.499(3)                                             | 8.4955(4)                                                   |
| c/Å                                         | 17.467(5)                                            | 17.4214(8)                                                  |
| $\alpha$ /°                                 | 90                                                   | 90                                                          |
| $\beta$ /°                                  | 101.542(12)                                          | 101.452(2)                                                  |
| $\gamma$ /°                                 | 90                                                   | 90                                                          |
| Volume/Å <sup>3</sup>                       | 7460(4)                                              | 7430.4(6)                                                   |
| Z                                           | 8                                                    | 8                                                           |
| $\rho_{\text{calc}}$ /g/cm <sup>3</sup>     | 1.766                                                | 1.782                                                       |
| $\mu$ /mm <sup>-1</sup>                     | 2.863                                                | 1.852                                                       |
| F(000)                                      | 3896.0                                               | 3904.0                                                      |
| Crystal size/mm <sup>3</sup>                | 0.3 × 0.18 × 0.04                                    | 0.18 × 0.14 × 0.04                                          |
| Radiation                                   | MoK $\alpha$ ( $\lambda$ = 0.71073)                  | MoK $\alpha$ ( $\lambda$ = 0.71073)                         |
| 2 $\theta$ range for data collection/°      | 7.238 to 54.998                                      | 6.926 to 55                                                 |
| Reflections collected                       | 63586                                                | 55550                                                       |
| Independent reflections                     | 8537<br>0.1275,<br>R <sub>sigma</sub> = 0.0841]      | [R <sub>int</sub> = 0.1045,<br>R <sub>sigma</sub> = 0.0738] |
| Data/restraints/parameters                  | 8537/0/500                                           | 8507/0/500                                                  |
| Goodness-of-fit on F <sup>2</sup>           | 1.029                                                | 1.032                                                       |
| Final R indexes [ $I \geq 2\sigma(I)$ ]     | R <sub>1</sub> = 0.0441,<br>wR <sub>2</sub> = 0.0797 | R <sub>1</sub> = 0.0397,<br>wR <sub>2</sub> = 0.0594        |
| Final R indexes [all data]                  | R <sub>1</sub> = 0.0746,<br>wR <sub>2</sub> = 0.0915 | R <sub>1</sub> = 0.0681,<br>wR <sub>2</sub> = 0.0679        |
| Largest diff. peak/hole / e Å <sup>-3</sup> | 2.59/-2.30                                           | 1.51/-1.71                                                  |

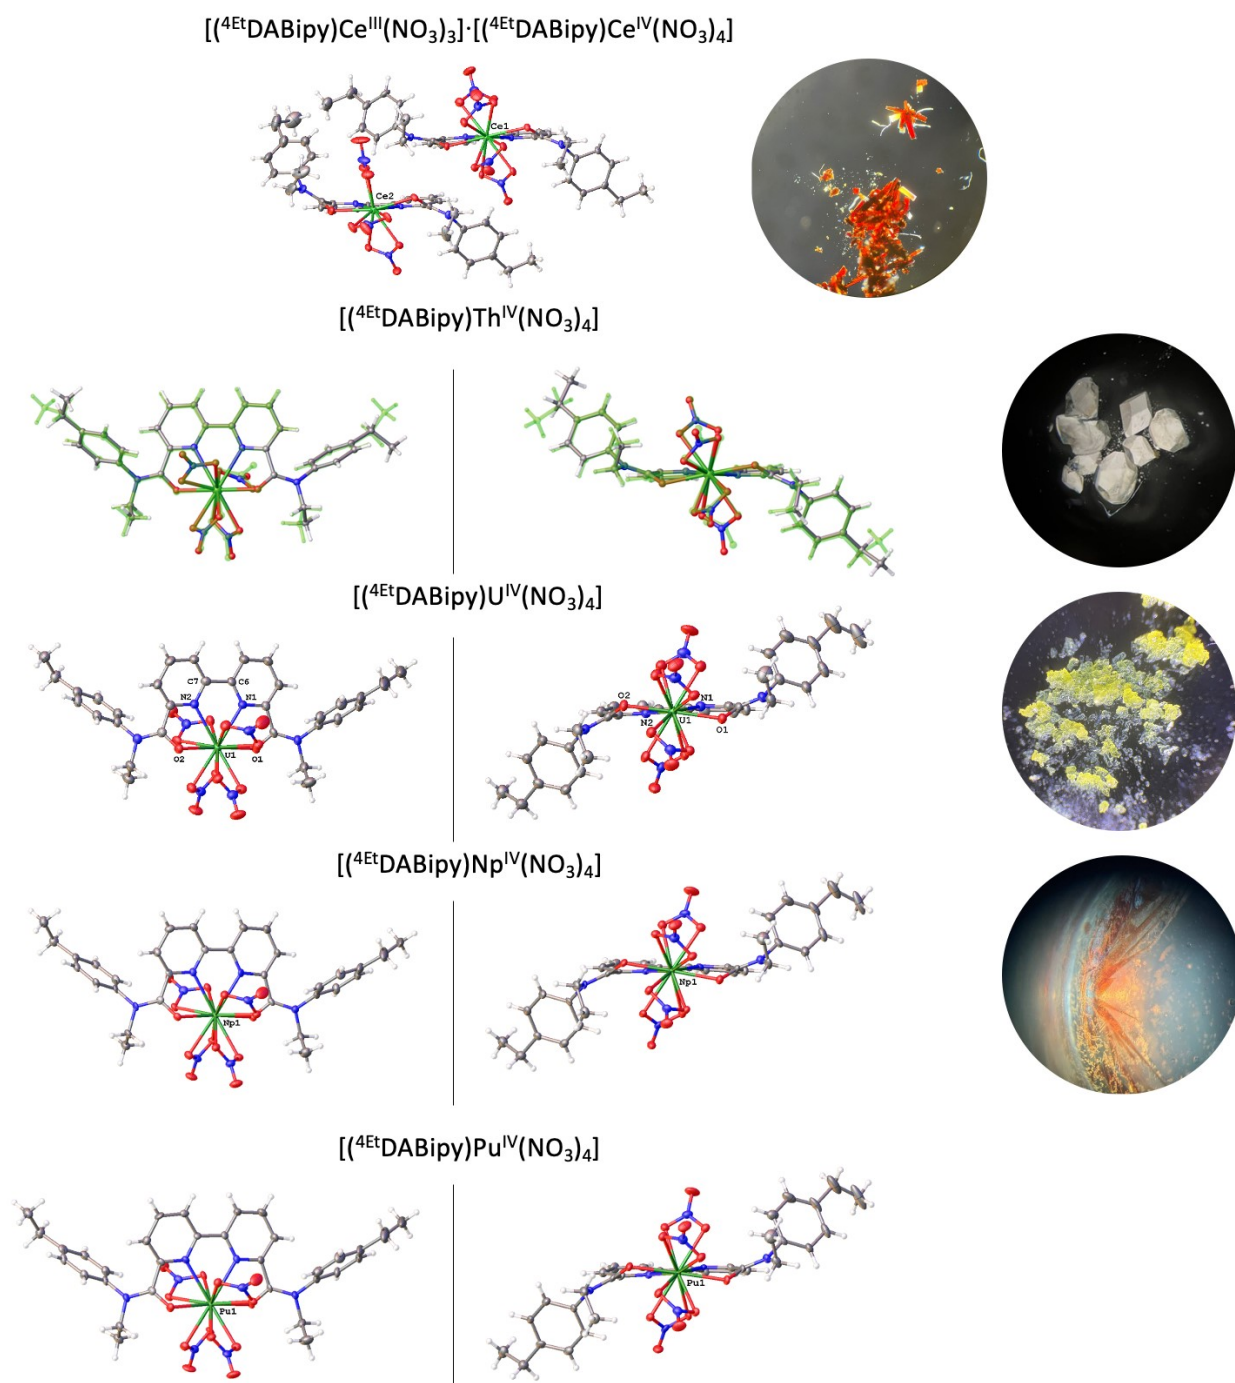

**Figure S1.** Molecular structures of  $[(^{4\text{Et}}\text{DABipy})\text{An}^{\text{IV}}(\text{NO}_3)_4]$  ( $\text{An}^{\text{IV}} = \text{Th}, \text{U}, \text{Np}, \text{Pu}$ ) in two projections and asymmetric unit of  $[(^{4\text{Et}}\text{DABipy})\text{Ce}^{\text{IV}}(\text{NO}_3)_4] \cdot [(^{4\text{Et}}\text{DABipy})\text{Ce}^{\text{III}}(\text{NO}_3)_3]$ . Displacement ellipsoids for all non-hydrogen atoms are shown at the 50% probability level. The structure of  $[(^{4\text{Et}}\text{DABipy})\text{Th}^{\text{IV}}(\text{NO}_3)_4]$  is superimposed on previously reported modification (CCDC 2395348).

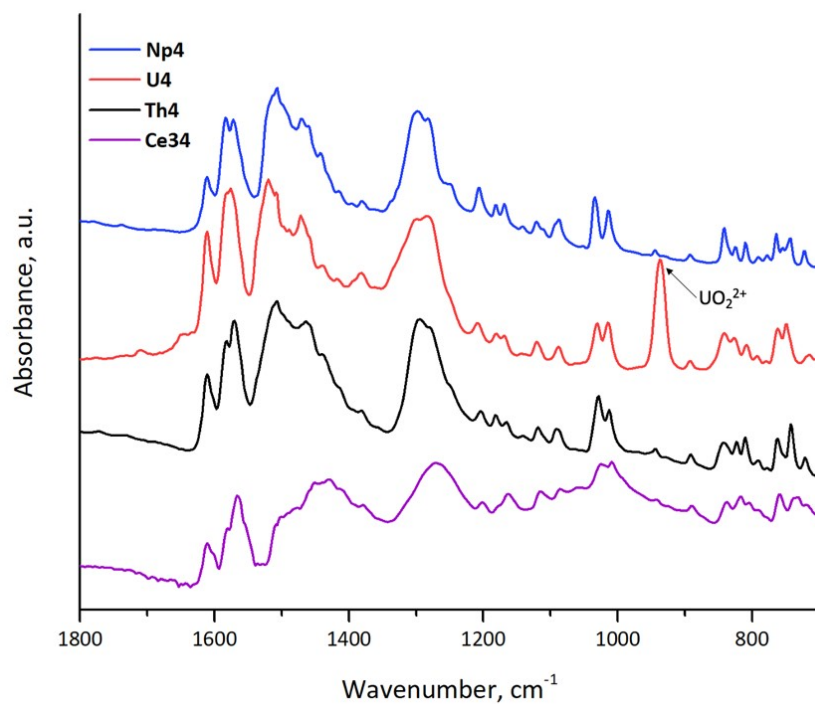

**Figure S2.** IR spectra of  $[(^{4\text{Et}}\text{DABipy})\text{Ce}^{\text{IV}}(\text{NO}_3)_4] \cdot [(^{4\text{Et}}\text{DABipy})\text{Ce}^{\text{III}}(\text{NO}_3)_3]$  (**Ce34**),  $[(^{4\text{Et}}\text{DABipy})\text{An}^{\text{IV}}(\text{NO}_3)_4]$  (**Th4**, **U4** and **Np4**) crystals.

### 3 Computational part

**Table S3.** Electron density  $\rho$  (in  $e/\text{Bohr}^3$ ), Laplacian  $\nabla^2\rho$  (in  $e/\text{Bohr}^5$ ), potential energy density  $V$ , Lagrangian kinetic energy  $G$  (in Hartree/ $\text{Bohr}^3$ ) at the bond critical points (3, -1), corresponding to the M–N and M–O bonds with DABipy ligand. Experimental and optimized lengths of the bonds  $l_{\text{exp}}$  and  $l_{\text{opt}}$  are in Å.

| Metal | Bond | $l_{\text{exp}}$ | $l_{\text{opt}}$ | $\rho$ | $\nabla^2\rho$ | $G$   | $V$    | $ V /G$ | WBI   |
|-------|------|------------------|------------------|--------|----------------|-------|--------|---------|-------|
| Ce    | Ce–O | 2.441            | 2.444            | 0.051  | 0.187          | 0.049 | -0.051 | 1.039   | 0.269 |
|       |      | 2.383            | 2.448            | 0.051  | 0.186          | 0.048 | -0.050 | 1.036   | 0.268 |
|       | Ce–N | 2.603            | 2.653            | 0.040  | 0.120          | 0.031 | -0.032 | 1.028   | 0.210 |
|       |      | 2.616            | 2.654            | 0.040  | 0.120          | 0.031 | -0.032 | 1.027   | 0.210 |
| Th    | Th–O | 2.454            | 2.462            | 0.051  | 0.231          | 0.058 | -0.057 | 0.998   | 0.148 |
|       |      | 2.432            | 2.466            | 0.050  | 0.228          | 0.057 | -0.057 | 0.996   | 0.147 |
|       | Th–N | 2.676            | 2.692            | 0.039  | 0.129          | 0.034 | -0.035 | 1.040   | 0.101 |
|       |      | 2.667            | 2.692            | 0.039  | 0.129          | 0.034 | -0.035 | 1.040   | 0.101 |
| U     | U–O  | 2.382            | 2.439            | 0.054  | 0.241          | 0.060 | -0.060 | 1.001   | 0.154 |
|       |      | 2.405            | 2.440            | 0.054  | 0.240          | 0.060 | -0.060 | 1.000   | 0.153 |
|       | U–N  | 2.616            | 2.638            | 0.043  | 0.152          | 0.038 | -0.038 | 0.997   | 0.117 |
|       |      | 2.624            | 2.639            | 0.043  | 0.151          | 0.038 | -0.038 | 0.997   | 0.117 |
| Np    | Np–O | 2.398            | 2.427            | 0.054  | 0.240          | 0.059 | -0.059 | 0.993   | 0.155 |
|       |      | 2.374            | 2.425            | 0.055  | 0.240          | 0.060 | -0.059 | 0.995   | 0.157 |
|       | Np–N | 2.605            | 2.641            | 0.041  | 0.145          | 0.036 | -0.035 | 0.986   | 0.115 |
|       |      | 2.611            | 2.641            | 0.041  | 0.145          | 0.036 | -0.035 | 0.987   | 0.114 |
| Pu    | Pu–O | 2.391            | 2.412            | 0.054  | 0.231          | 0.057 | -0.057 | 0.993   | 0.138 |
|       |      | 2.371            | 2.414            | 0.054  | 0.230          | 0.057 | -0.056 | 0.992   | 0.138 |
|       | Pu–N | 2.601            | 2.626            | 0.042  | 0.140          | 0.035 | -0.034 | 0.992   | 0.105 |
|       |      | 2.594            | 2.626            | 0.042  | 0.140          | 0.035 | -0.034 | 0.991   | 0.105 |

**Table S4.** Electron density  $\rho$  (in  $e/\text{Bohr}^3$ ), Laplacian  $\nabla^2\rho$  (in  $e/\text{Bohr}^5$ ), potential energy density  $V$ , Lagrangian kinetic energy  $G$  (in Hartree/ $\text{Bohr}^3$ ) at the bond critical points (3, -1), corresponding to the M–O bonds with nitrate ligands. Experimental and optimized lengths of the bonds  $l_{\text{exp}}$  and  $l_{\text{opt}}$  are in Å.

| Metal | Bond   | $l_{\text{exp}}$ | $l_{\text{opt}}$ | $\rho$ | $\nabla^2\rho$ | $G$   | $V$    | $ V /G$ | WBI   |
|-------|--------|------------------|------------------|--------|----------------|-------|--------|---------|-------|
| Ce    | Ce–4O  | 2.574            | 2.525            | 0.046  | 0.160          | 0.040 | -0.041 | 1.009   | 0.285 |
|       | Ce–5O  | 2.529            | 2.521            | 0.047  | 0.159          | 0.040 | -0.040 | 1.008   | 0.300 |
|       | Ce–7O  | 2.576            | 2.453            | 0.055  | 0.174          | 0.047 | -0.050 | 1.071   | 0.356 |
|       | Ce–8O  | 2.509            | 2.435            | 0.058  | 0.176          | 0.048 | -0.053 | 1.091   | 0.371 |
|       | Ce–10O | 2.537            | 2.522            | 0.046  | 0.159          | 0.040 | -0.040 | 1.007   | 0.299 |
|       | Ce–11O | 2.507            | 2.521            | 0.047  | 0.161          | 0.041 | -0.041 | 1.013   | 0.287 |
|       | Ce–13O | 2.557            | 2.439            | 0.057  | 0.175          | 0.048 | -0.052 | 1.086   | 0.369 |
|       | Ce–14O | 2.565            | 2.449            | 0.056  | 0.175          | 0.047 | -0.051 | 1.075   | 0.358 |
| Th    | Th–4O  | 2.606            | 2.579            | 0.043  | 0.170          | 0.042 | -0.042 | 0.998   | 0.142 |
|       | Th–5O  | 2.628            | 2.584            | 0.043  | 0.167          | 0.042 | -0.042 | 1.002   | 0.138 |
|       | Th–7O  | 2.619            | 2.512            | 0.050  | 0.200          | 0.051 | -0.052 | 1.023   | 0.182 |
|       | Th–8O  | 2.549            | 2.501            | 0.052  | 0.203          | 0.053 | -0.055 | 1.038   | 0.186 |
|       | Th–10O | 2.583            | 2.586            | 0.043  | 0.166          | 0.042 | -0.042 | 1.002   | 0.137 |
|       | Th–11O | 2.588            | 2.577            | 0.043  | 0.171          | 0.043 | -0.043 | 0.998   | 0.142 |

|        |        |       |       |       |       |       |        |        |       |
|--------|--------|-------|-------|-------|-------|-------|--------|--------|-------|
|        | Th-130 | 2.593 | 2.505 | 0.051 | 0.201 | 0.052 | -0.054 | 1.036  | 0.185 |
|        | Th-140 | 2.607 | 2.508 | 0.051 | 0.202 | 0.052 | -0.053 | 1.024  | 0.184 |
| U      | U-40   | 2.582 | 2.548 | 0.046 | 0.188 | 0.045 | -0.044 | 0.963  | 0.156 |
|        | U-50   | 2.564 | 2.542 | 0.047 | 0.185 | 0.045 | -0.043 | 0.964  | 0.165 |
|        | U-70   | 2.501 | 2.470 | 0.056 | 0.213 | 0.055 | -0.057 | 1.032  | 0.205 |
|        | U-80   | 2.578 | 2.440 | 0.061 | 0.218 | 0.058 | -0.061 | 1.059  | 0.227 |
|        | U-100  | 2.548 | 2.543 | 0.046 | 0.185 | 0.045 | -0.043 | 0.963  | 0.164 |
|        | U-110  | 2.549 | 2.543 | 0.047 | 0.190 | 0.046 | -0.045 | 0.967  | 0.158 |
|        | U-130  | 2.552 | 2.444 | 0.060 | 0.217 | 0.057 | -0.061 | 1.056  | 0.226 |
|        | U-140  | 2.558 | 2.465 | 0.057 | 0.215 | 0.056 | -0.058 | 1.035  | 0.206 |
|        | Np     | Np-40 | 2.569 | 2.519 | 0.048 | 0.193 | 0.047  | -0.045 | 0.969 |
| Np-50  |        | 2.548 | 2.549 | 0.045 | 0.180 | 0.043 | -0.041 | 0.947  | 0.159 |
| Np-70  |        | 2.494 | 2.432 | 0.059 | 0.226 | 0.059 | -0.061 | 1.038  | 0.227 |
| Np-80  |        | 2.561 | 2.409 | 0.063 | 0.232 | 0.062 | -0.066 | 1.061  | 0.248 |
| Np-100 |        | 2.535 | 2.529 | 0.047 | 0.185 | 0.044 | -0.043 | 0.960  | 0.170 |
| Np-110 |        | 2.530 | 2.538 | 0.046 | 0.189 | 0.045 | -0.043 | 0.956  | 0.158 |
| Np-130 |        | 2.547 | 2.427 | 0.061 | 0.225 | 0.059 | -0.062 | 1.048  | 0.235 |
| Np-140 |        | 2.542 | 2.435 | 0.059 | 0.225 | 0.059 | -0.061 | 1.038  | 0.223 |
| Pu     | Pu-40  | 2.553 | 2.518 | 0.046 | 0.183 | 0.044 | -0.042 | 0.954  | 0.145 |
|        | Pu-50  | 2.530 | 2.525 | 0.045 | 0.176 | 0.042 | -0.040 | 0.949  | 0.147 |
|        | Pu-70  | 2.482 | 2.435 | 0.057 | 0.214 | 0.054 | -0.055 | 1.017  | 0.194 |
|        | Pu-80  | 2.550 | 2.411 | 0.061 | 0.219 | 0.057 | -0.059 | 1.040  | 0.211 |
|        | Pu-100 | 2.513 | 2.528 | 0.045 | 0.175 | 0.042 | -0.039 | 0.947  | 0.146 |
|        | Pu-110 | 2.513 | 2.513 | 0.047 | 0.185 | 0.044 | -0.043 | 0.957  | 0.146 |
|        | Pu-130 | 2.534 | 2.415 | 0.060 | 0.218 | 0.056 | -0.059 | 1.036  | 0.208 |
|        | Pu-140 | 2.520 | 2.429 | 0.058 | 0.216 | 0.055 | -0.057 | 1.022  | 0.197 |

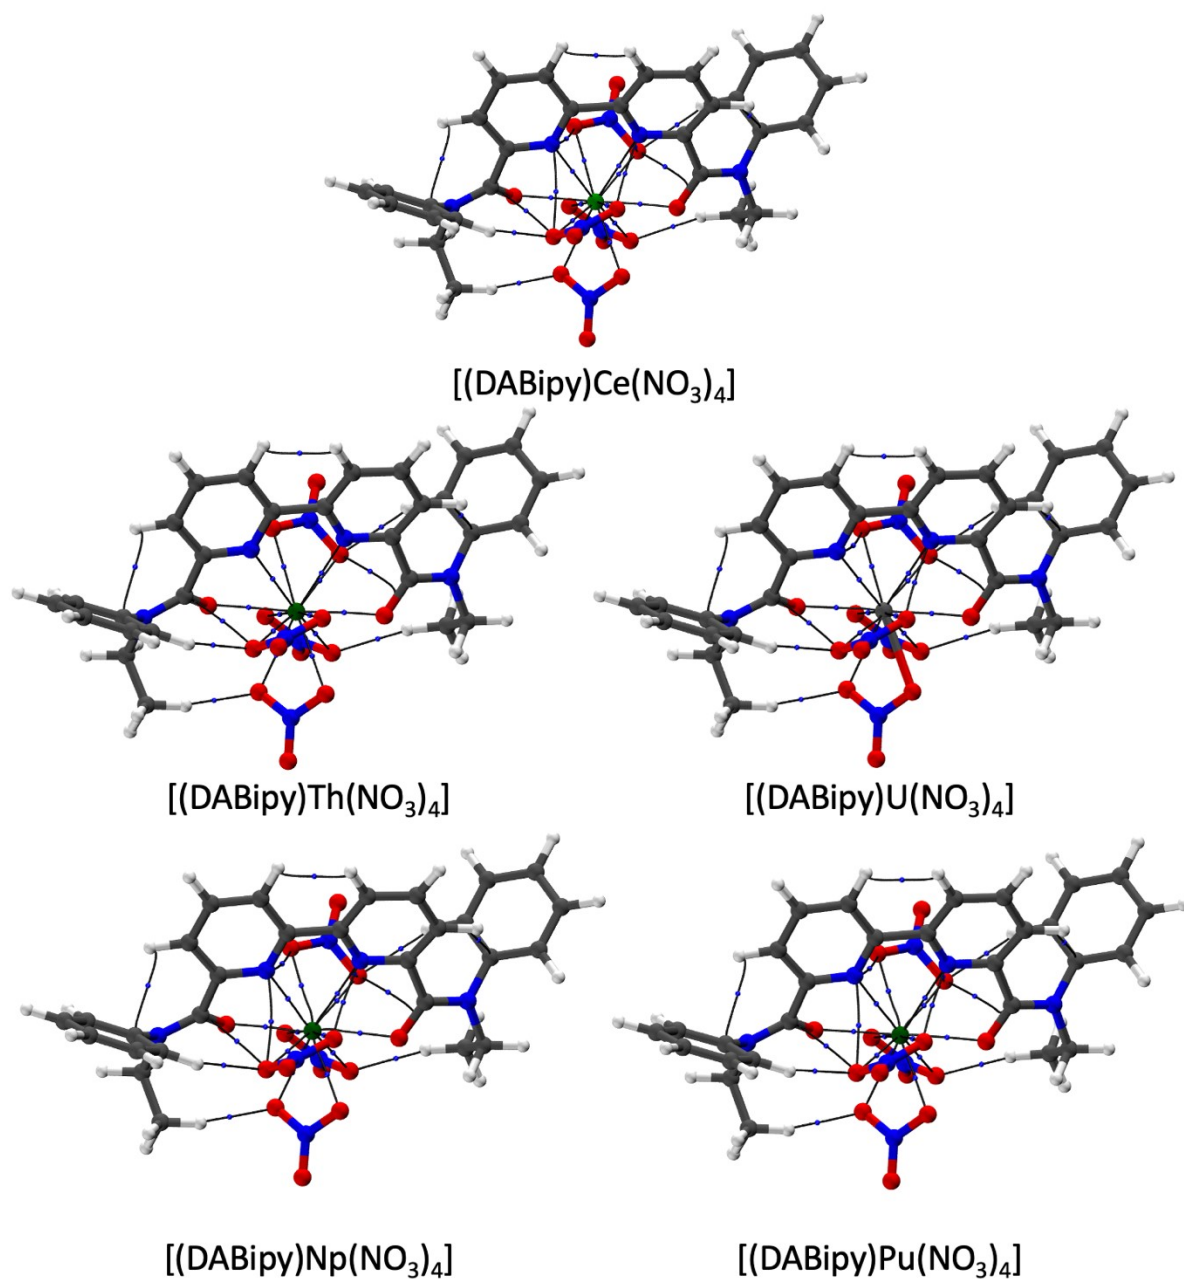

**Figure S3.** Representation of the optimized structures [(DABipy)M(NO<sub>3</sub>)<sub>4</sub>] (M = Ce, Th, U, Np, Pu) with assigned black bond paths and (3,-1) BCPs (black dots) for metal-ligand and other intramolecular interactions.

**Table S5.** Optimized XYZ coordinates.

| [(DABipy)Ce(NO <sub>3</sub> ) <sub>4</sub> ] |             |             |             |  |
|----------------------------------------------|-------------|-------------|-------------|--|
| Ce                                           | 3.494194000 | 4.029429000 | 6.844990000 |  |
| O                                            | 3.313599000 | 2.702643000 | 8.889678000 |  |
| O                                            | 3.681537000 | 5.332275000 | 4.780580000 |  |
| O                                            | 5.583063000 | 4.097527000 | 8.262506000 |  |
| O                                            | 5.203164000 | 5.861114000 | 7.126551000 |  |
| O                                            | 6.872145000 | 5.826579000 | 8.519868000 |  |
| O                                            | 4.837992000 | 1.978514000 | 6.770096000 |  |
| O                                            | 5.539590000 | 3.609995000 | 5.593170000 |  |
| O                                            | 6.676665000 | 1.756675000 | 5.630894000 |  |

|   |              |              |              |
|---|--------------|--------------|--------------|
| O | 1.190189000  | 4.276755000  | 7.839947000  |
| O | 1.276815000  | 4.435855000  | 5.716124000  |
| O | -0.614507000 | 4.768376000  | 6.730600000  |
| O | 2.124671000  | 2.024281000  | 6.611783000  |
| O | 3.118454000  | 2.670438000  | 4.842604000  |
| O | 1.831497000  | 0.918851000  | 4.762682000  |
| N | 3.232190000  | 5.307305000  | 9.155383000  |
| N | 2.668835000  | 6.551342000  | 6.868505000  |
| N | 4.416009000  | 2.380751000  | 10.837189000 |
| N | 2.346146000  | 6.412981000  | 3.310389000  |
| N | 5.931902000  | 5.289242000  | 7.982342000  |
| N | 5.732464000  | 2.414737000  | 5.977253000  |
| N | 0.562812000  | 4.496151000  | 6.768550000  |
| N | 2.333749000  | 1.822241000  | 5.376040000  |
| C | 3.753236000  | 3.150751000  | 9.959566000  |
| C | 3.418716000  | 4.586576000  | 10.266252000 |
| C | 3.160418000  | 5.082689000  | 11.543103000 |
| H | 3.322062000  | 4.459129000  | 12.424351000 |
| C | 2.677305000  | 6.382260000  | 11.654089000 |
| H | 2.443527000  | 6.804169000  | 12.636819000 |
| C | 2.478228000  | 7.131678000  | 10.502129000 |
| H | 2.074466000  | 8.144120000  | 10.570689000 |
| C | 2.771531000  | 6.559483000  | 9.258813000  |
| C | 2.558126000  | 7.281777000  | 7.984378000  |
| C | 2.292953000  | 8.655381000  | 7.937419000  |
| H | 2.234432000  | 9.245493000  | 8.854543000  |
| C | 2.136881000  | 9.271150000  | 6.702651000  |
| H | 1.942611000  | 10.346711000 | 6.640483000  |
| C | 2.247472000  | 8.507948000  | 5.545159000  |
| H | 2.138938000  | 8.957297000  | 4.556365000  |
| C | 2.519515000  | 7.147558000  | 5.680745000  |
| C | 2.854912000  | 6.225381000  | 4.538665000  |
| C | 4.611344000  | 0.961793000  | 10.494285000 |
| H | 3.738488000  | 0.653727000  | 9.898688000  |
| H | 4.606379000  | 0.403063000  | 11.445562000 |
| C | 5.897823000  | 0.726969000  | 9.723511000  |
| H | 5.867154000  | 1.246546000  | 8.752298000  |
| H | 6.015567000  | -0.352869000 | 9.530346000  |
| H | 6.776445000  | 1.072010000  | 10.295909000 |
| C | 5.251068000  | 2.932422000  | 11.855809000 |
| C | 6.256800000  | 3.840050000  | 11.511138000 |
| H | 6.400925000  | 4.111567000  | 10.459413000 |
| C | 7.061054000  | 4.379291000  | 12.515000000 |
| C | 6.881275000  | 3.997976000  | 13.845432000 |
| H | 7.521033000  | 4.418931000  | 14.628738000 |
| C | 5.891769000  | 3.068388000  | 14.177195000 |
| H | 5.752219000  | 2.760284000  | 15.219026000 |

|                                              |              |             |              |
|----------------------------------------------|--------------|-------------|--------------|
| C                                            | 5.073259000  | 2.533508000 | 13.183981000 |
| H                                            | 4.283848000  | 1.816190000 | 13.435103000 |
| C                                            | 2.793505000  | 5.506749000 | 2.238727000  |
| H                                            | 3.835523000  | 5.233626000 | 2.464598000  |
| H                                            | 2.773377000  | 6.088760000 | 1.301741000  |
| C                                            | 1.924635000  | 4.265889000 | 2.140059000  |
| H                                            | 1.990220000  | 3.678647000 | 3.069676000  |
| H                                            | 2.281060000  | 3.633564000 | 1.309224000  |
| H                                            | 0.870277000  | 4.529235000 | 1.945405000  |
| C                                            | 1.148171000  | 7.156762000 | 3.084676000  |
| C                                            | 1.150114000  | 8.197057000 | 2.150516000  |
| H                                            | 2.073574000  | 8.443368000 | 1.614465000  |
| C                                            | -0.018439000 | 8.923214000 | 1.927931000  |
| C                                            | -1.182708000 | 8.611446000 | 2.635590000  |
| H                                            | -2.098849000 | 9.186404000 | 2.462049000  |
| C                                            | -1.179489000 | 7.561127000 | 3.554626000  |
| H                                            | -2.092097000 | 7.301641000 | 4.101692000  |
| C                                            | -0.019116000 | 6.819392000 | 3.775762000  |
| H                                            | -0.006141000 | 5.978558000 | 4.478219000  |
| H                                            | -0.018037000 | 9.742377000 | 1.200790000  |
| H                                            | 7.844370000  | 5.095432000 | 12.244578000 |
| [(DABipy)Th(NO <sub>3</sub> ) <sub>4</sub> ] |              |             |              |
| Th                                           | 3.516162000  | 4.005879000 | 6.822739000  |
| O                                            | 3.328355000  | 2.712285000 | 8.908592000  |
| O                                            | 3.681796000  | 5.362247000 | 4.769829000  |
| O                                            | 5.621589000  | 4.118271000 | 8.308422000  |
| O                                            | 5.251380000  | 5.888081000 | 7.171776000  |
| O                                            | 6.899445000  | 5.852727000 | 8.593365000  |
| O                                            | 4.930420000  | 1.931013000 | 6.748354000  |
| O                                            | 5.639927000  | 3.574138000 | 5.574486000  |
| O                                            | 6.791976000  | 1.728197000 | 5.639843000  |
| O                                            | 1.150420000  | 4.304300000 | 7.822527000  |
| O                                            | 1.245953000  | 4.471024000 | 5.695780000  |
| O                                            | -0.644724000 | 4.824231000 | 6.706426000  |
| O                                            | 2.086213000  | 1.967190000 | 6.554556000  |
| O                                            | 3.088394000  | 2.615751000 | 4.779373000  |
| O                                            | 1.772092000  | 0.884148000 | 4.693113000  |
| N                                            | 3.237647000  | 5.311607000 | 9.160588000  |
| N                                            | 2.674613000  | 6.562459000 | 6.862395000  |
| N                                            | 4.400335000  | 2.385239000 | 10.870217000 |
| N                                            | 2.339439000  | 6.435504000 | 3.301942000  |
| N                                            | 5.970972000  | 5.315515000 | 8.036417000  |
| N                                            | 5.835989000  | 2.378918000 | 5.966490000  |
| N                                            | 0.528106000  | 4.534623000 | 6.749488000  |
| N                                            | 2.290113000  | 1.773257000 | 5.313891000  |
| C                                            | 3.760560000  | 3.159765000 | 9.985618000  |
| C                                            | 3.437804000  | 4.601510000 | 10.278205000 |

|   |              |              |              |
|---|--------------|--------------|--------------|
| C | 3.201336000  | 5.112254000  | 11.552727000 |
| H | 3.372659000  | 4.497386000  | 12.438256000 |
| C | 2.728134000  | 6.415890000  | 11.657219000 |
| H | 2.512911000  | 6.849992000  | 12.638799000 |
| C | 2.516006000  | 7.154101000  | 10.500823000 |
| H | 2.122253000  | 8.170242000  | 10.567433000 |
| C | 2.785634000  | 6.568029000  | 9.258651000  |
| C | 2.554989000  | 7.286652000  | 7.982111000  |
| C | 2.258341000  | 8.653929000  | 7.941063000  |
| H | 2.189759000  | 9.240552000  | 8.859324000  |
| C | 2.078374000  | 9.270242000  | 6.710223000  |
| H | 1.858006000  | 10.341015000 | 6.653973000  |
| C | 2.196116000  | 8.514026000  | 5.548922000  |
| H | 2.067165000  | 8.964104000  | 4.562926000  |
| C | 2.500273000  | 7.160517000  | 5.676959000  |
| C | 2.844841000  | 6.250687000  | 4.527085000  |
| C | 4.559793000  | 0.956066000  | 10.544438000 |
| H | 3.661774000  | 0.651881000  | 9.985113000  |
| H | 4.576435000  | 0.417955000  | 11.507017000 |
| C | 5.815367000  | 0.682606000  | 9.736463000  |
| H | 5.756356000  | 1.163492000  | 8.746445000  |
| H | 5.915926000  | -0.405071000 | 9.580783000  |
| H | 6.716443000  | 1.037920000  | 10.266038000 |
| C | 5.252017000  | 2.929644000  | 11.880222000 |
| C | 6.270161000  | 3.816331000  | 11.518502000 |
| H | 6.405166000  | 4.079543000  | 10.462982000 |
| C | 7.093181000  | 4.347709000  | 12.511284000 |
| C | 6.918356000  | 3.979058000  | 13.845911000 |
| H | 7.573075000  | 4.393317000  | 14.620371000 |
| C | 5.914846000  | 3.070411000  | 14.193785000 |
| H | 5.779516000  | 2.772578000  | 15.239124000 |
| C | 5.077653000  | 2.542946000  | 13.212287000 |
| H | 4.278213000  | 1.841432000  | 13.475977000 |
| C | 2.812880000  | 5.552974000  | 2.219665000  |
| H | 3.866654000  | 5.317782000  | 2.433945000  |
| H | 2.762951000  | 6.145086000  | 1.290492000  |
| C | 1.990569000  | 4.281641000  | 2.111210000  |
| H | 2.113646000  | 3.660461000  | 3.012784000  |
| H | 2.340906000  | 3.695791000  | 1.244317000  |
| H | 0.920619000  | 4.509257000  | 1.962197000  |
| C | 1.130903000  | 7.164018000  | 3.076042000  |
| C | 1.120698000  | 8.207693000  | 2.145878000  |
| H | 2.041000000  | 8.469752000  | 1.611933000  |
| C | -0.057973000 | 8.917574000  | 1.924505000  |
| C | -1.218964000 | 8.585433000  | 2.628508000  |
| H | -2.143123000 | 9.147529000  | 2.455370000  |
| C | -1.202237000 | 7.531629000  | 3.543261000  |

|                                             |              |              |              |
|---------------------------------------------|--------------|--------------|--------------|
| H                                           | -2.111446000 | 7.256463000  | 4.088169000  |
| C                                           | -0.031658000 | 6.805958000  | 3.764150000  |
| H                                           | -0.004903000 | 5.965173000  | 4.466626000  |
| H                                           | -0.068307000 | 9.739748000  | 1.200916000  |
| H                                           | 7.886636000  | 5.047422000  | 12.228064000 |
| [(DABipy)U(NO <sub>3</sub> ) <sub>4</sub> ] |              |              |              |
| U                                           | 3.485073000  | 4.041854000  | 6.856326000  |
| O                                           | 3.338341000  | 2.715817000  | 8.897521000  |
| O                                           | 3.644899000  | 5.326774000  | 4.788255000  |
| O                                           | 5.591246000  | 4.118028000  | 8.288196000  |
| O                                           | 5.193836000  | 5.895345000  | 7.181265000  |
| O                                           | 6.881797000  | 5.846995000  | 8.555974000  |
| O                                           | 4.856723000  | 1.988979000  | 6.776183000  |
| O                                           | 5.541323000  | 3.631786000  | 5.608418000  |
| O                                           | 6.694350000  | 1.783644000  | 5.625849000  |
| O                                           | 1.160806000  | 4.331627000  | 7.847093000  |
| O                                           | 1.247848000  | 4.456247000  | 5.721287000  |
| O                                           | -0.647266000 | 4.802426000  | 6.728203000  |
| O                                           | 2.104303000  | 2.039099000  | 6.622465000  |
| O                                           | 3.088594000  | 2.671880000  | 4.845231000  |
| O                                           | 1.803438000  | 0.914266000  | 4.781839000  |
| N                                           | 3.230191000  | 5.302651000  | 9.159864000  |
| N                                           | 2.661669000  | 6.549230000  | 6.866491000  |
| N                                           | 4.415046000  | 2.378969000  | 10.856309000 |
| N                                           | 2.342725000  | 6.423253000  | 3.301948000  |
| N                                           | 5.938020000  | 5.314474000  | 8.021640000  |
| N                                           | 5.747822000  | 2.431856000  | 5.980721000  |
| N                                           | 0.529551000  | 4.531958000  | 6.770936000  |
| N                                           | 2.306974000  | 1.822543000  | 5.384800000  |
| C                                           | 3.772540000  | 3.158011000  | 9.974155000  |
| C                                           | 3.447393000  | 4.595584000  | 10.275595000 |
| C                                           | 3.220835000  | 5.107535000  | 11.551577000 |
| H                                           | 3.403701000  | 4.495613000  | 12.436654000 |
| C                                           | 2.744688000  | 6.409875000  | 11.658432000 |
| H                                           | 2.537512000  | 6.844398000  | 12.641651000 |
| C                                           | 2.520741000  | 7.146663000  | 10.503310000 |
| H                                           | 2.127129000  | 8.162594000  | 10.572733000 |
| C                                           | 2.778862000  | 6.559406000  | 9.259537000  |
| C                                           | 2.541507000  | 7.274522000  | 7.985634000  |
| C                                           | 2.238919000  | 8.640170000  | 7.942235000  |
| H                                           | 2.168785000  | 9.228639000  | 8.859124000  |
| C                                           | 2.055992000  | 9.253350000  | 6.710289000  |
| H                                           | 1.832494000  | 10.323441000 | 6.651789000  |
| C                                           | 2.174474000  | 8.495469000  | 5.550231000  |
| H                                           | 2.042757000  | 8.944142000  | 4.564151000  |
| C                                           | 2.480717000  | 7.142350000  | 5.680017000  |
| C                                           | 2.826081000  | 6.226917000  | 4.537138000  |

|                                              |              |              |              |
|----------------------------------------------|--------------|--------------|--------------|
| C                                            | 4.586358000  | 0.954533000  | 10.517364000 |
| H                                            | 3.692360000  | 0.648584000  | 9.952598000  |
| H                                            | 4.605411000  | 0.406065000  | 11.474118000 |
| C                                            | 5.845692000  | 0.700194000  | 9.708732000  |
| H                                            | 5.786058000  | 1.203690000  | 8.730150000  |
| H                                            | 5.949387000  | -0.383463000 | 9.528852000  |
| H                                            | 6.744347000  | 1.047395000  | 10.247754000 |
| C                                            | 5.262030000  | 2.918481000  | 11.871994000 |
| C                                            | 6.277133000  | 3.814062000  | 11.522899000 |
| H                                            | 6.415721000  | 4.090094000  | 10.471547000 |
| C                                            | 7.095341000  | 4.339453000  | 12.522883000 |
| C                                            | 6.919631000  | 3.956419000  | 13.853320000 |
| H                                            | 7.570838000  | 4.365792000  | 14.633317000 |
| C                                            | 5.919352000  | 3.039926000  | 14.189293000 |
| H                                            | 5.782700000  | 2.730804000  | 15.231185000 |
| C                                            | 5.086843000  | 2.518860000  | 13.200354000 |
| H                                            | 4.289503000  | 1.811756000  | 13.455208000 |
| C                                            | 2.820600000  | 5.532514000  | 2.228727000  |
| H                                            | 3.872499000  | 5.295960000  | 2.450919000  |
| H                                            | 2.777720000  | 6.117255000  | 1.294524000  |
| C                                            | 1.996742000  | 4.261451000  | 2.126550000  |
| H                                            | 2.099677000  | 3.661619000  | 3.044980000  |
| H                                            | 2.364179000  | 3.656048000  | 1.280417000  |
| H                                            | 0.930760000  | 4.488903000  | 1.950905000  |
| C                                            | 1.143057000  | 7.159607000  | 3.060707000  |
| C                                            | 1.149336000  | 8.198842000  | 2.125292000  |
| H                                            | 2.076756000  | 8.450174000  | 1.598612000  |
| C                                            | -0.020842000 | 8.918315000  | 1.889905000  |
| C                                            | -1.190604000 | 8.601379000  | 2.586095000  |
| H                                            | -2.107987000 | 9.171147000  | 2.402375000  |
| C                                            | -1.191141000 | 7.552642000  | 3.506910000  |
| H                                            | -2.107637000 | 7.289667000  | 4.045683000  |
| C                                            | -0.029339000 | 6.817091000  | 3.740900000  |
| H                                            | -0.018888000 | 5.980695000  | 4.448856000  |
| H                                            | -0.017309000 | 9.736440000  | 1.161646000  |
| H                                            | 7.886180000  | 5.045926000  | 12.249063000 |
| [(DABipy)Np(NO <sub>3</sub> ) <sub>4</sub> ] |              |              |              |
| Np                                           | 3.482842000  | 4.041918000  | 6.859152000  |
| O                                            | 3.324847000  | 2.727386000  | 8.893087000  |
| O                                            | 3.648443000  | 5.330181000  | 4.811733000  |
| O                                            | 5.565887000  | 4.139825000  | 8.271730000  |
| O                                            | 5.181005000  | 5.918809000  | 7.163746000  |
| O                                            | 6.835399000  | 5.877344000  | 8.578974000  |
| O                                            | 4.827457000  | 2.015757000  | 6.799036000  |
| O                                            | 5.514665000  | 3.647569000  | 5.626549000  |
| O                                            | 6.676485000  | 1.804109000  | 5.667105000  |
| O                                            | 1.171692000  | 4.339921000  | 7.842097000  |

|   |              |              |              |
|---|--------------|--------------|--------------|
| O | 1.253021000  | 4.444202000  | 5.715533000  |
| O | -0.626877000 | 4.852690000  | 6.727751000  |
| O | 2.103076000  | 2.056228000  | 6.650428000  |
| O | 3.094977000  | 2.682346000  | 4.877259000  |
| O | 1.775814000  | 0.950648000  | 4.802313000  |
| N | 3.231362000  | 5.308647000  | 9.163411000  |
| N | 2.642425000  | 6.545873000  | 6.877489000  |
| N | 4.415127000  | 2.378312000  | 10.843441000 |
| N | 2.350130000  | 6.413882000  | 3.312255000  |
| N | 5.907624000  | 5.342488000  | 8.018322000  |
| N | 5.725564000  | 2.452188000  | 6.007972000  |
| N | 0.542444000  | 4.549287000  | 6.767481000  |
| N | 2.297362000  | 1.843797000  | 5.412099000  |
| C | 3.770072000  | 3.162645000  | 9.967717000  |
| C | 3.450264000  | 4.599217000  | 10.276440000 |
| C | 3.223074000  | 5.105913000  | 11.554396000 |
| H | 3.410433000  | 4.491539000  | 12.436880000 |
| C | 2.739676000  | 6.405267000  | 11.665679000 |
| H | 2.532016000  | 6.836270000  | 12.650360000 |
| C | 2.507128000  | 7.142735000  | 10.512648000 |
| H | 2.104369000  | 8.154988000  | 10.584452000 |
| C | 2.768402000  | 6.560421000  | 9.267166000  |
| C | 2.522955000  | 7.273663000  | 7.994567000  |
| C | 2.221794000  | 8.639452000  | 7.949458000  |
| H | 2.152016000  | 9.228620000  | 8.865988000  |
| C | 2.041320000  | 9.251382000  | 6.716376000  |
| H | 1.818553000  | 10.321533000 | 6.656118000  |
| C | 2.164272000  | 8.492197000  | 5.557792000  |
| H | 2.037983000  | 8.939361000  | 4.570245000  |
| C | 2.468351000  | 7.138674000  | 5.690173000  |
| C | 2.825062000  | 6.223734000  | 4.551560000  |
| C | 4.577566000  | 0.953893000  | 10.502104000 |
| H | 3.685729000  | 0.657810000  | 9.928787000  |
| H | 4.584012000  | 0.401471000  | 11.456843000 |
| C | 5.841871000  | 0.691515000  | 9.703839000  |
| H | 5.794799000  | 1.199811000  | 8.727187000  |
| H | 5.938339000  | -0.392228000 | 9.520625000  |
| H | 6.738451000  | 1.029187000  | 10.252277000 |
| C | 5.269934000  | 2.913728000  | 11.854614000 |
| C | 6.280222000  | 3.813139000  | 11.501197000 |
| H | 6.408357000  | 4.095890000  | 10.450319000 |
| C | 7.106152000  | 4.335361000  | 12.496325000 |
| C | 6.943297000  | 3.945138000  | 13.826340000 |
| H | 7.600613000  | 4.351836000  | 14.602605000 |
| C | 5.947679000  | 3.025159000  | 14.166520000 |
| H | 5.820707000  | 2.710810000  | 15.208078000 |
| C | 5.107182000  | 2.507555000  | 13.182521000 |

|                                              |              |             |              |
|----------------------------------------------|--------------|-------------|--------------|
| H                                            | 4.313305000  | 1.798034000 | 13.441392000 |
| C                                            | 2.835975000  | 5.519309000 | 2.246048000  |
| H                                            | 3.884948000  | 5.280690000 | 2.479402000  |
| H                                            | 2.804134000  | 6.100944000 | 1.309442000  |
| C                                            | 2.008671000  | 4.250793000 | 2.139974000  |
| H                                            | 2.098470000  | 3.654990000 | 3.062267000  |
| H                                            | 2.382897000  | 3.640404000 | 1.300425000  |
| H                                            | 0.945626000  | 4.481659000 | 1.951403000  |
| C                                            | 1.152684000  | 7.150018000 | 3.060098000  |
| C                                            | 1.165862000  | 8.185130000 | 2.120154000  |
| H                                            | 2.096647000  | 8.432614000 | 1.597613000  |
| C                                            | -0.001791000 | 8.905325000 | 1.874835000  |
| C                                            | -1.175859000 | 8.593611000 | 2.566179000  |
| H                                            | -2.091119000 | 9.164406000 | 2.375166000  |
| C                                            | -1.183150000 | 7.549262000 | 3.491900000  |
| H                                            | -2.102815000 | 7.290670000 | 4.027385000  |
| C                                            | -0.023998000 | 6.812564000 | 3.735354000  |
| H                                            | -0.019019000 | 5.979690000 | 4.447496000  |
| H                                            | 0.007225000  | 9.720436000 | 1.143247000  |
| H                                            | 7.892787000  | 5.045058000 | 12.218763000 |
| [(DABipy)Pu(NO <sub>3</sub> ) <sub>4</sub> ] |              |             |              |
| Pu                                           | 3.471922000  | 4.069288000 | 6.877381000  |
| O                                            | 3.309855000  | 2.757523000 | 8.895296000  |
| O                                            | 3.647923000  | 5.344219000 | 4.834622000  |
| O                                            | 5.549602000  | 4.145571000 | 8.298050000  |
| O                                            | 5.156586000  | 5.923324000 | 7.196532000  |
| O                                            | 6.858626000  | 5.862325000 | 8.553350000  |
| O                                            | 4.806202000  | 2.033376000 | 6.809464000  |
| O                                            | 5.519763000  | 3.677091000 | 5.667196000  |
| O                                            | 6.658461000  | 1.820027000 | 5.684559000  |
| O                                            | 1.168294000  | 4.366753000 | 7.874643000  |
| O                                            | 1.263543000  | 4.484077000 | 5.752173000  |
| O                                            | -0.643068000 | 4.802372000 | 6.746360000  |
| O                                            | 2.084645000  | 2.105616000 | 6.645593000  |
| O                                            | 3.102070000  | 2.726564000 | 4.887367000  |
| O                                            | 1.801131000  | 0.981673000 | 4.801566000  |
| N                                            | 3.233388000  | 5.330504000 | 9.167970000  |
| N                                            | 2.637771000  | 6.559623000 | 6.886851000  |
| N                                            | 4.399593000  | 2.386836000 | 10.840509000 |
| N                                            | 2.355290000  | 6.413472000 | 3.320464000  |
| N                                            | 5.904952000  | 5.339610000 | 8.027599000  |
| N                                            | 5.713008000  | 2.474006000 | 6.030234000  |
| N                                            | 0.537434000  | 4.551742000 | 6.798030000  |
| N                                            | 2.302959000  | 1.884272000 | 5.413454000  |
| C                                            | 3.765761000  | 3.183950000 | 9.969751000  |
| C                                            | 3.463964000  | 4.622966000 | 10.280701000 |
| C                                            | 3.259008000  | 5.136456000 | 11.559426000 |

|   |              |              |              |
|---|--------------|--------------|--------------|
| H | 3.453751000  | 4.523895000  | 12.441744000 |
| C | 2.787965000  | 6.440320000  | 11.673072000 |
| H | 2.599237000  | 6.876800000  | 12.659058000 |
| C | 2.543090000  | 7.174944000  | 10.520970000 |
| H | 2.151174000  | 8.191410000  | 10.594517000 |
| C | 2.779404000  | 6.585360000  | 9.274024000  |
| C | 2.518268000  | 7.291688000  | 8.001335000  |
| C | 2.195220000  | 8.652317000  | 7.951777000  |
| H | 2.120818000  | 9.244193000  | 8.866318000  |
| C | 1.995670000  | 9.254995000  | 6.717357000  |
| H | 1.754813000  | 10.320953000 | 6.653629000  |
| C | 2.122182000  | 8.492081000  | 5.561355000  |
| H | 1.982119000  | 8.933046000  | 4.572773000  |
| C | 2.447466000  | 7.144198000  | 5.697668000  |
| C | 2.817487000  | 6.228463000  | 4.564547000  |
| C | 4.533795000  | 0.960056000  | 10.495721000 |
| H | 3.633403000  | 0.681495000  | 9.927044000  |
| H | 4.534996000  | 0.406960000  | 11.450062000 |
| C | 5.788161000  | 0.673904000  | 9.689998000  |
| H | 5.739862000  | 1.173059000  | 8.708559000  |
| H | 5.867811000  | -0.412810000 | 9.516355000  |
| H | 6.693851000  | 1.003535000  | 10.228274000 |
| C | 5.269165000  | 2.904735000  | 11.848096000 |
| C | 6.292005000  | 3.788308000  | 11.490797000 |
| H | 6.415841000  | 4.072292000  | 10.439694000 |
| C | 7.134062000  | 4.291879000  | 12.482021000 |
| C | 6.973482000  | 3.899627000  | 13.811716000 |
| H | 7.644283000  | 4.290492000  | 14.584557000 |
| C | 5.963656000  | 2.996704000  | 14.155680000 |
| H | 5.838938000  | 2.680177000  | 15.196839000 |
| C | 5.107816000  | 2.496989000  | 13.175662000 |
| H | 4.302309000  | 1.801975000  | 13.437745000 |
| C | 2.875596000  | 5.537638000  | 2.255178000  |
| H | 3.924615000  | 5.316233000  | 2.504866000  |
| H | 2.849565000  | 6.128735000  | 1.324274000  |
| C | 2.076121000  | 4.254461000  | 2.118463000  |
| H | 2.177350000  | 3.638405000  | 3.026440000  |
| H | 2.466312000  | 3.672661000  | 1.265897000  |
| H | 1.008800000  | 4.465964000  | 1.931201000  |
| C | 1.149927000  | 7.132144000  | 3.057156000  |
| C | 1.154368000  | 8.163007000  | 2.112429000  |
| H | 2.084325000  | 8.421117000  | 1.593660000  |
| C | -0.021347000 | 8.866763000  | 1.858007000  |
| C | -1.194907000 | 8.542572000  | 2.544360000  |
| H | -2.116407000 | 9.100891000  | 2.346651000  |
| C | -1.193345000 | 7.502033000  | 3.474442000  |
| H | -2.112217000 | 7.234321000  | 4.006776000  |

|   |              |             |              |
|---|--------------|-------------|--------------|
| C | -0.025790000 | 6.782368000 | 3.728088000  |
| H | -0.011982000 | 5.953434000 | 4.444898000  |
| H | -0.018955000 | 9.679121000 | 1.123310000  |
| H | 7.932085000  | 4.987559000 | 12.201494000 |

#### 4 UV-vis data

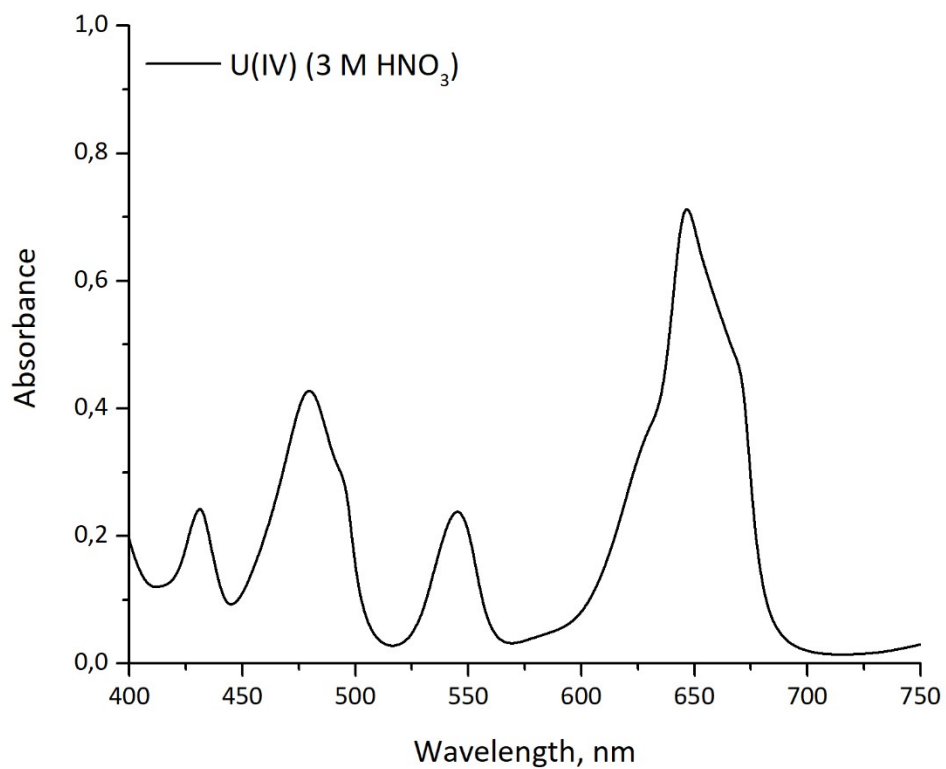

Figure S4. UV-vis absorption spectrum of the initial aqueous solution of U(IV) in 3 M HNO<sub>3</sub>.

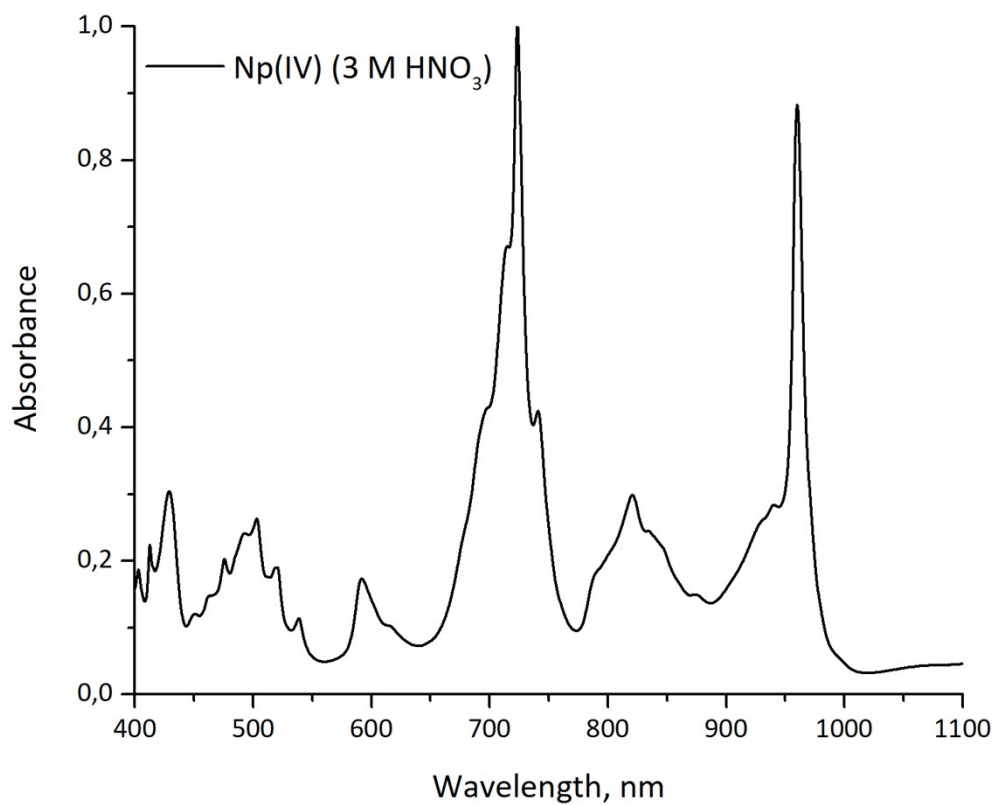

Figure S5. UV-vis absorption spectrum of the initial aqueous solution of Np(IV) in 3 M HNO<sub>3</sub>.

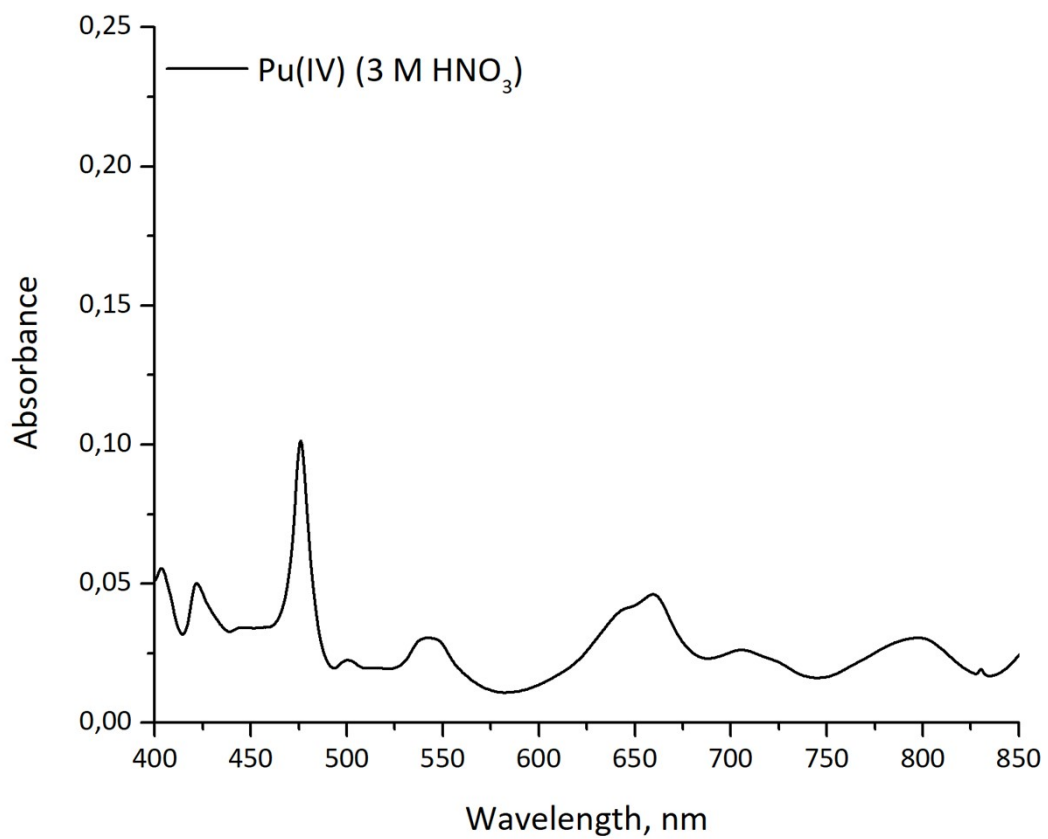

**Figure S6.** UV-vis absorption spectrum of the initial aqueous solution of Pu(IV) in 3 M HNO<sub>3</sub>.

## 5 <sup>1</sup>H-NMR data

**Table S6.** Chemical shifts assignment of (<sup>4</sup>EtDABipy)M<sup>IV</sup>(NO<sub>3</sub>)<sub>4</sub> complexes in CH<sub>3</sub>CN-*d*<sub>3</sub> (M<sup>IV</sup> = Ce, Th, U, Np, Pu).

| M <sup>IV</sup> | 3Py   | 4Py  | 5Py  | 2,6Ar | 3,5Ar | EtN-CH <sub>2</sub> | EtN-CH <sub>3</sub> | EtAr-CH <sub>2</sub> | EtAr-CH <sub>3</sub> |
|-----------------|-------|------|------|-------|-------|---------------------|---------------------|----------------------|----------------------|
| Ce              | 8.30  | 7.89 | 6.93 | 7.36  |       | 4.14                | 1.30                | 2.71                 | 2.23                 |
| Th              | 8.29  | 7.91 | 7.00 | 7.34  |       | 4.13                | 1.31                | 2.70                 | 2.23                 |
| U               | 12.47 | 9.93 | 6.03 | 10.55 | 8.37  | 17.28               | 6.56                | 1.67                 | 3.30                 |
| Np              | 10.72 | 9.08 | 6.33 | 8.82  | 7.75  | 13.03               | 3.90                | 2.93                 | 1.18                 |
| Pu              | 8.88  | 8.43 | 7.39 | 7.06  |       | 4.23                | 1.26                | 2.76                 | 1.26                 |

**Table S7.** Chemical shifts assignment of (<sup>4</sup>EtDABipy)M<sup>IV</sup>(NO<sub>3</sub>)<sub>4</sub> complexes in F-3 (M<sup>IV</sup> = Ce, Th, U, Np, Pu) with internal standard DMSO-*d*<sub>6</sub>.

| M <sup>IV</sup> | 3Py       | 4Py  | 5Py  | 2,6Ar     | 3,5Ar     | EtN-CH <sub>2</sub> | EtN-CH <sub>3</sub> | EtAr-CH <sub>2</sub> | EtAr-CH <sub>3</sub> | H <sub>2</sub> O |
|-----------------|-----------|------|------|-----------|-----------|---------------------|---------------------|----------------------|----------------------|------------------|
| Ce              | under F-3 | 7.44 | 6.61 | 6.99      | 6.78      | 3.69                | 0.76                | 2.08                 | 0.61                 | 3.45             |
| Th              | 7.50      | 6.76 | 6.55 | 6.70      |           | 3.68                | 0.77                | 2.07                 | 0.61                 | 3.45             |
| U               | 11.54     | 9.68 | 7.14 | 9.73      | under F-3 | 15.04               | 6.45                | 2.80                 | 1.20                 | 5.22             |
| Np              | 10.07     | 8.84 | 6.34 | under F-3 |           | 11.65               | 3.07                | 2.50                 | 0.95                 | 5.33             |
| Pu              | 8.57      | 8.13 | 7.18 | 7.32      | 6.98      | 3.89                | 1.02                | 2.30                 | 0.82                 | 5.29             |

**Table S8.** Chemical shifts assignment of <sup>4</sup>EtDABipy in F-3 and <sup>4</sup>EtDABipy in F-3 after contact with 3 M HNO<sub>3</sub> with internal standard DMSO-*d*<sub>6</sub>.

|                                                           | 3Py        | 4Py  | 5Py  | 2,6Ar | 3,5Ar | EtN-CH <sub>2</sub> | EtN-CH <sub>3</sub> | EtAr-CH <sub>2</sub> | EtAr-CH <sub>3</sub> | H <sub>2</sub> O |
|-----------------------------------------------------------|------------|------|------|-------|-------|---------------------|---------------------|----------------------|----------------------|------------------|
| <sup>4</sup> EtDABipy                                     | 7.10       | 7.28 | 6.94 | 6.56  |       | 3.53                | 0.76                | 1.97                 | 0.53                 | 5.38;<br>1.60    |
| <sup>4</sup> EtDABipy contacted with 3 M HNO <sub>3</sub> | 6.54; 6.49 |      |      | 6.41  |       | 3.45*               | 0.66                | 1.84                 | 0.39                 | 3.46             |

\*under H<sub>2</sub>O

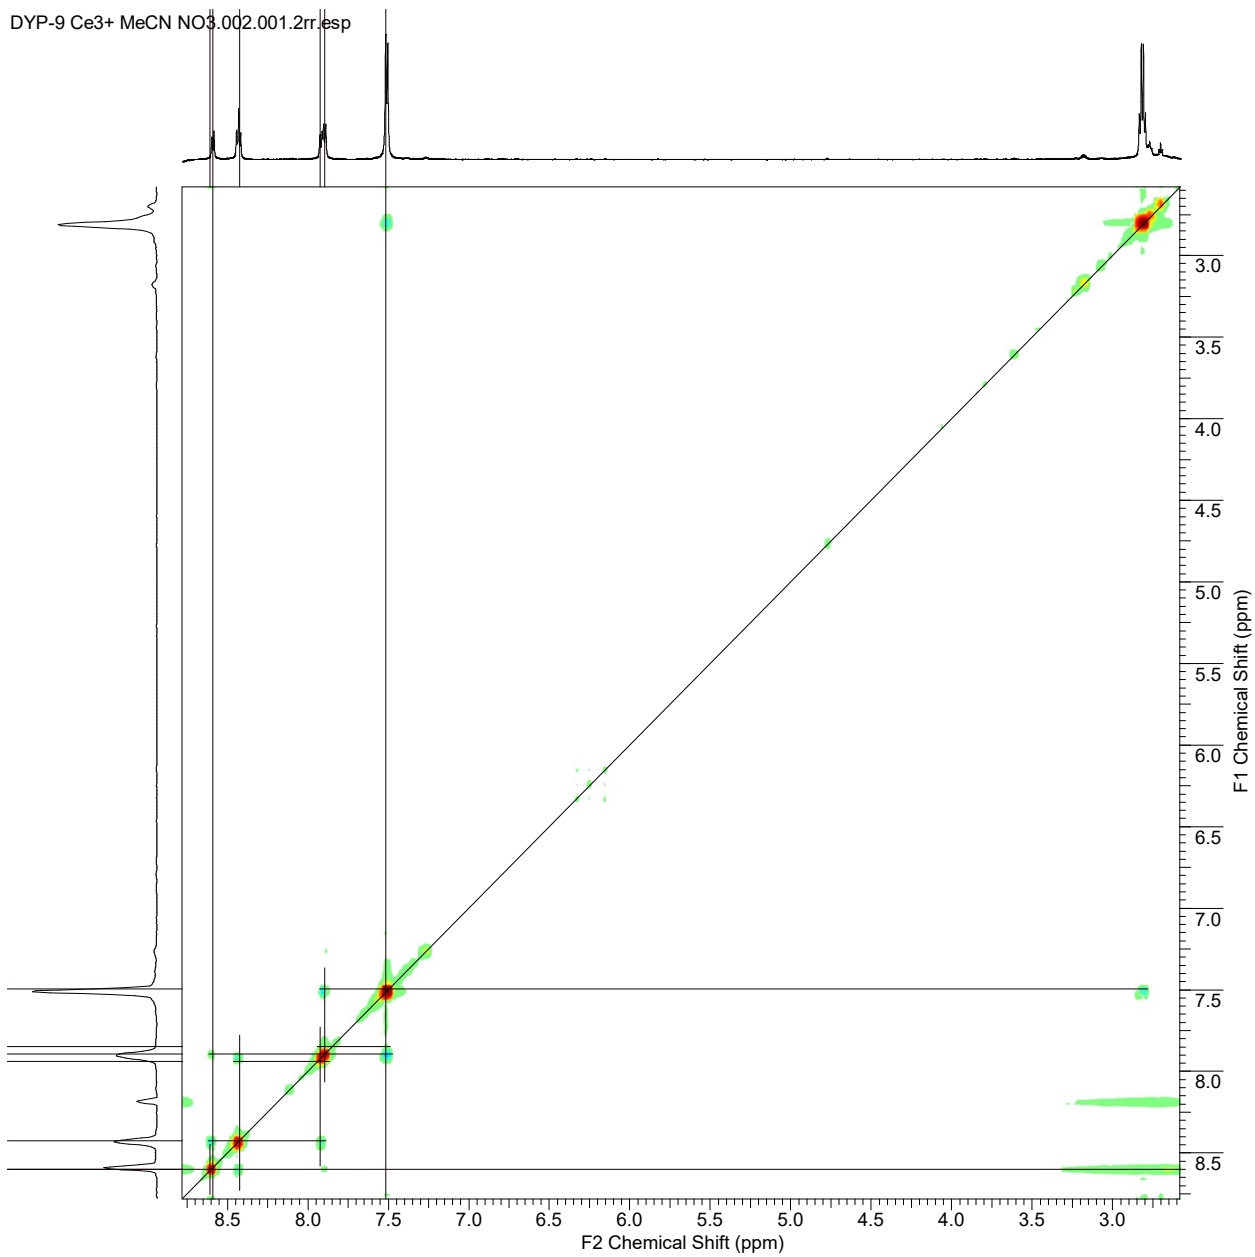

**Figure S7.**  $^1\text{H}$ -NOESY  $\text{Ce}^{4+}$  (600.13MHz for  $^1\text{H}$ ,  $\text{CH}_3\text{CN}-d_3$ , 303K).

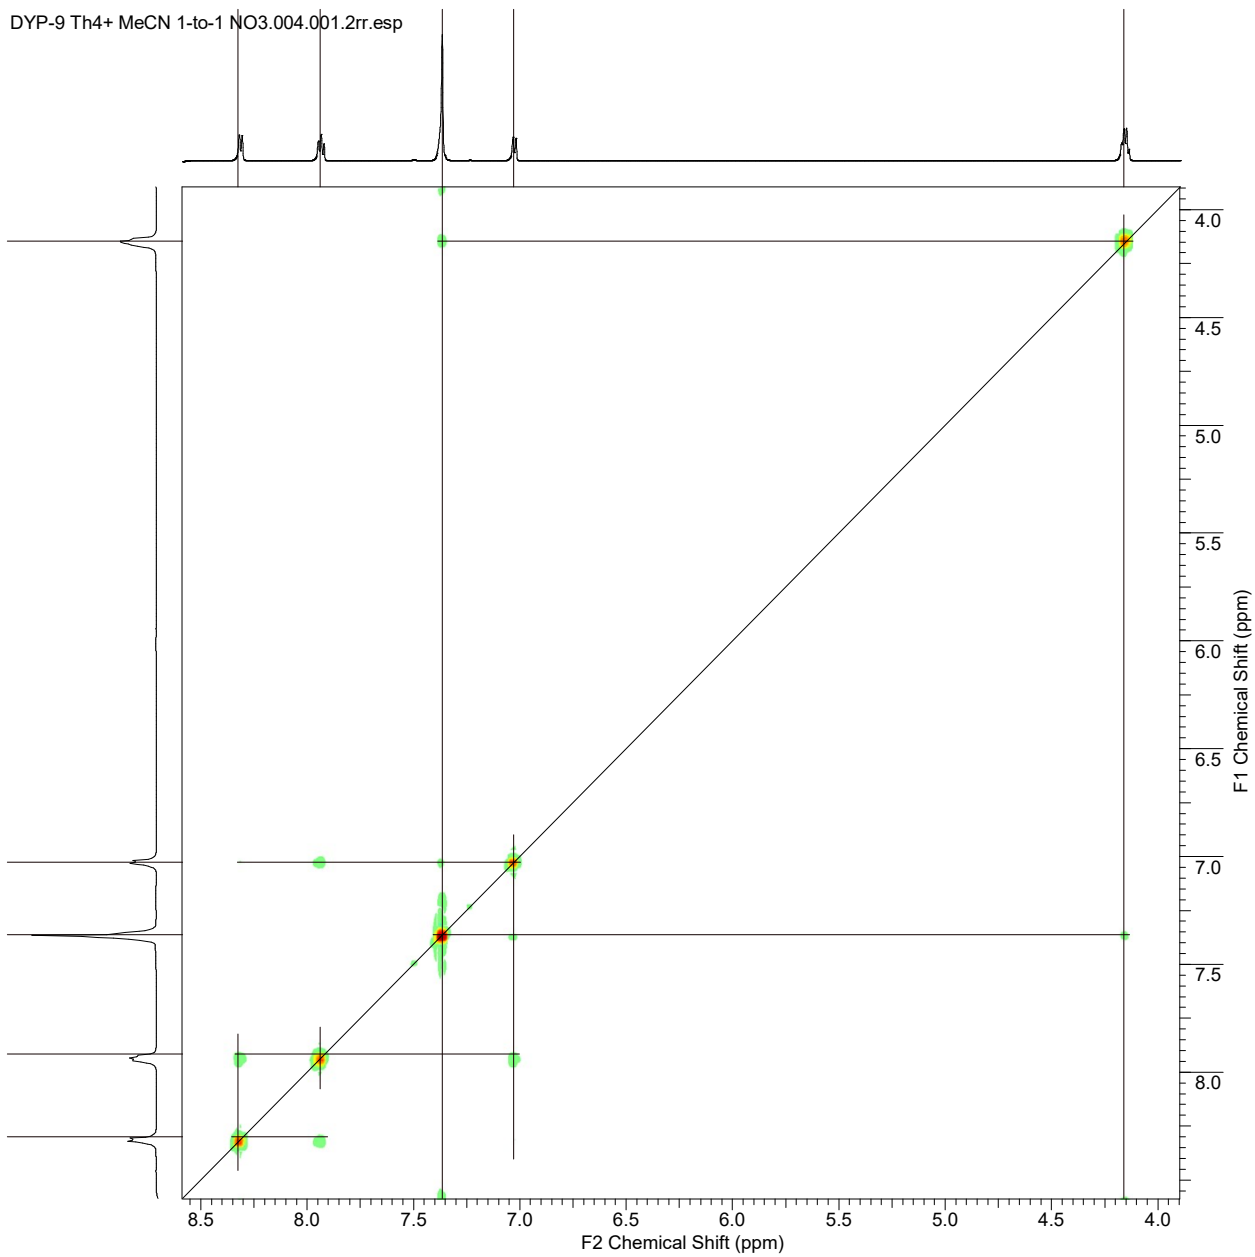

**Figure S8.**  $^1\text{H}$ - $^1\text{H}$  ROESY  $\text{Th}^{4+}$  (600.13MHz for  $^1\text{H}$ ,  $\text{CH}_3\text{CN}-d_3$ , 303K).

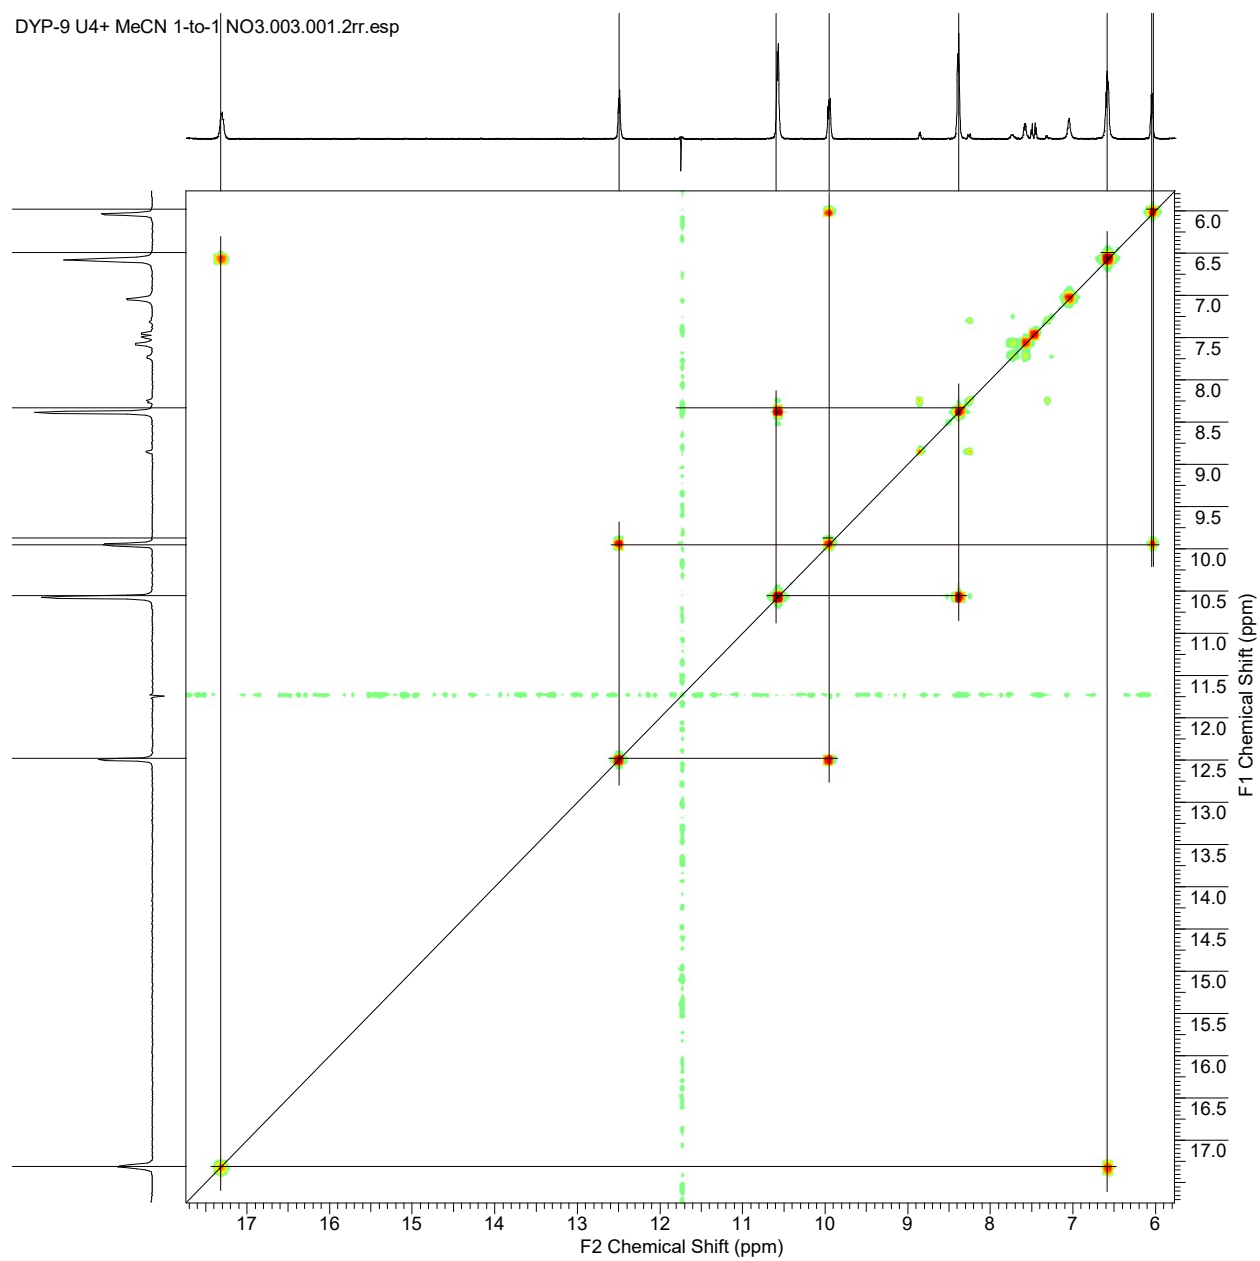

**Figure S9.**  $^1\text{H}$ - $^1\text{H}$  COSY  $\text{U}^{4+}$  (600.13MHz for  $^1\text{H}$ ,  $\text{CH}_3\text{CN}-d_3$ , 303K).

DYP-9 Np4+ MeCN NO3.003.001.2rr.esp

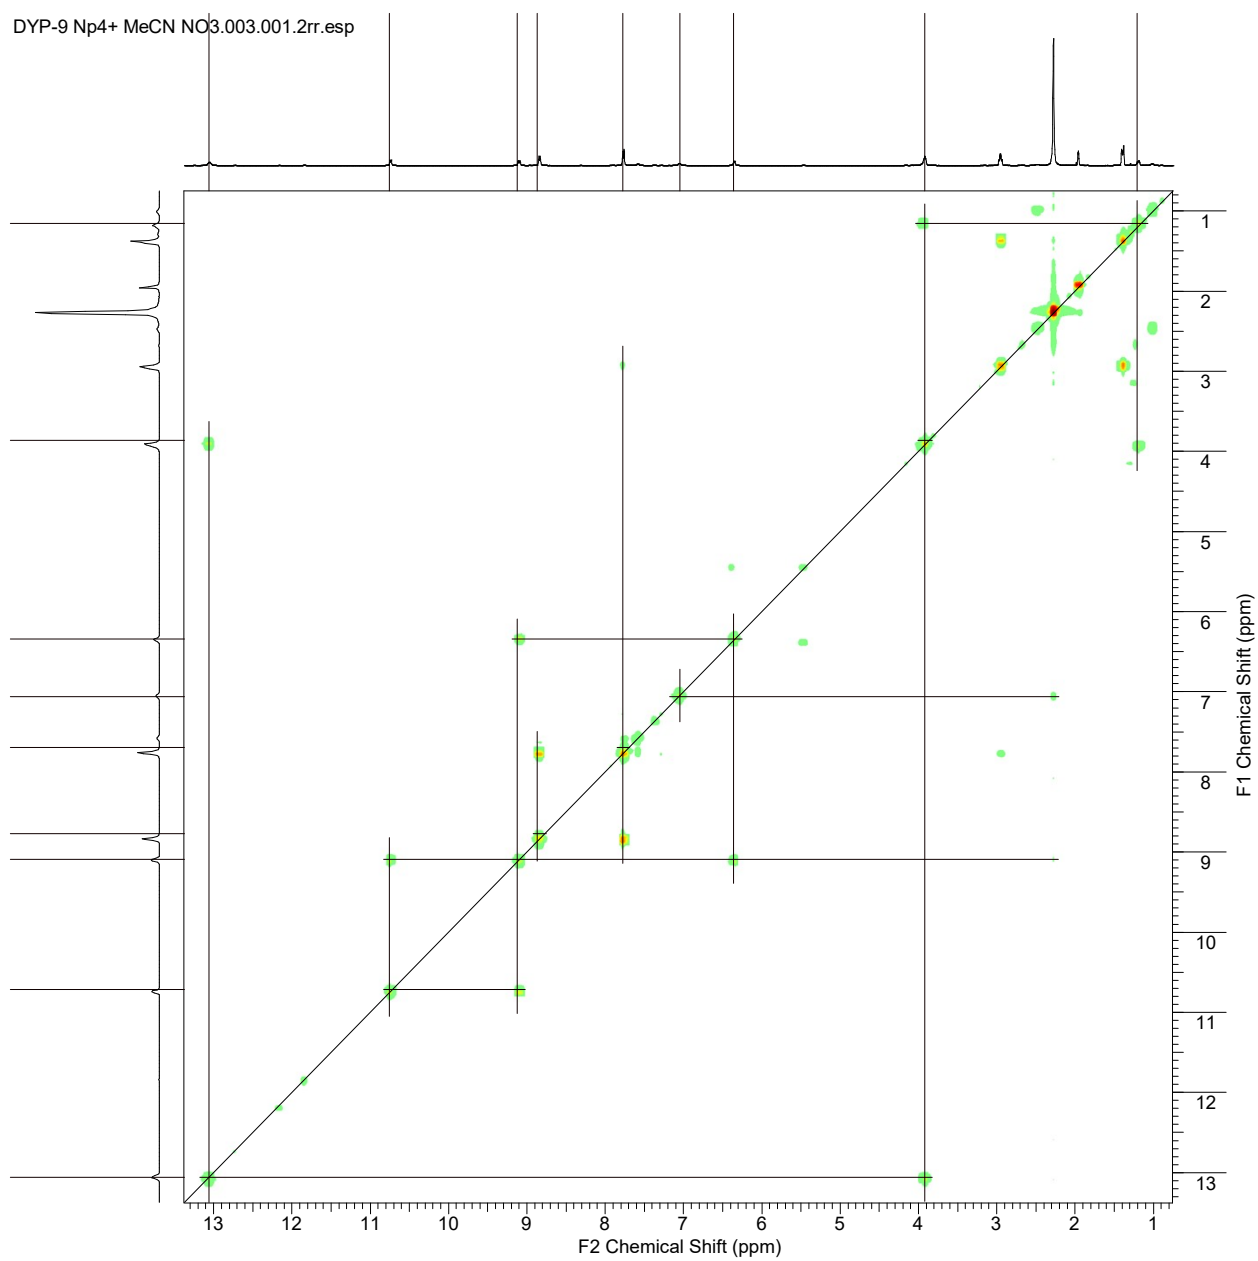

**Figure S10.**  $^1\text{H}$ - $^1\text{H}$  COSY  $\text{Np}^{4+}$  (600.13MHz for  $^1\text{H}$ ,  $\text{CH}_3\text{CN-}d_3$ , 303K).

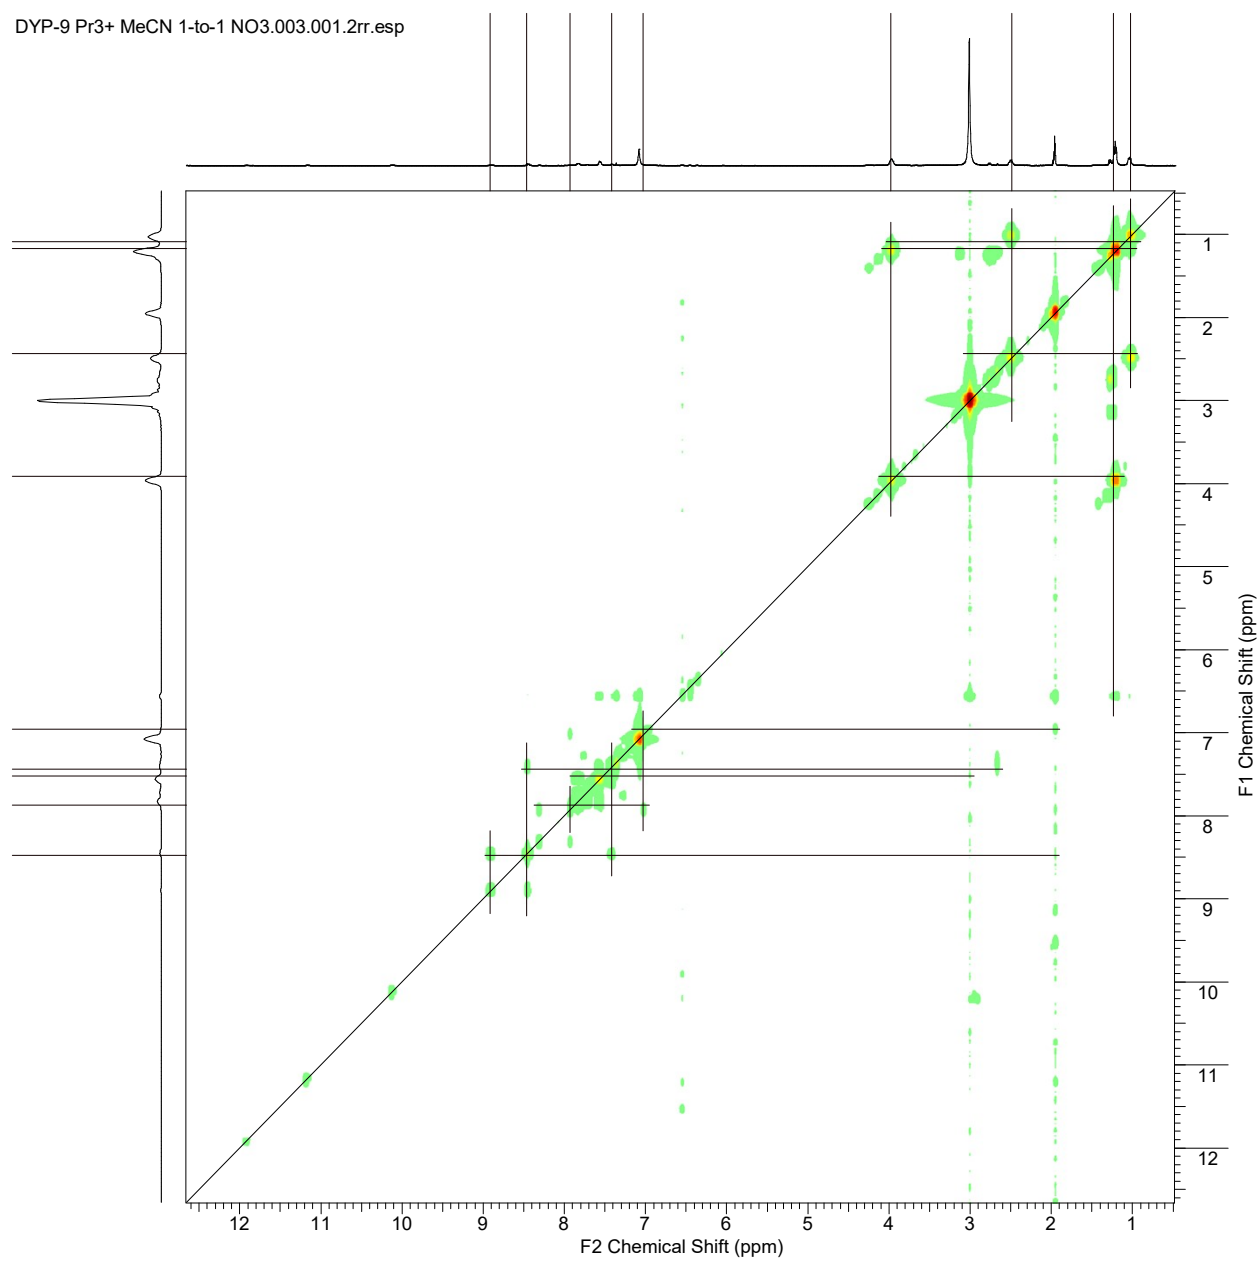

**Figure S11.**  $^1\text{H}$ - $^1\text{H}$  COSY  $\text{Pu}^{4+}$  (600.13MHz for  $^1\text{H}$ ,  $\text{CH}_3\text{CN-}d_3$ , 303K).

DYP-9 Ce4+ F3 NO3.003.001.2rr.esp

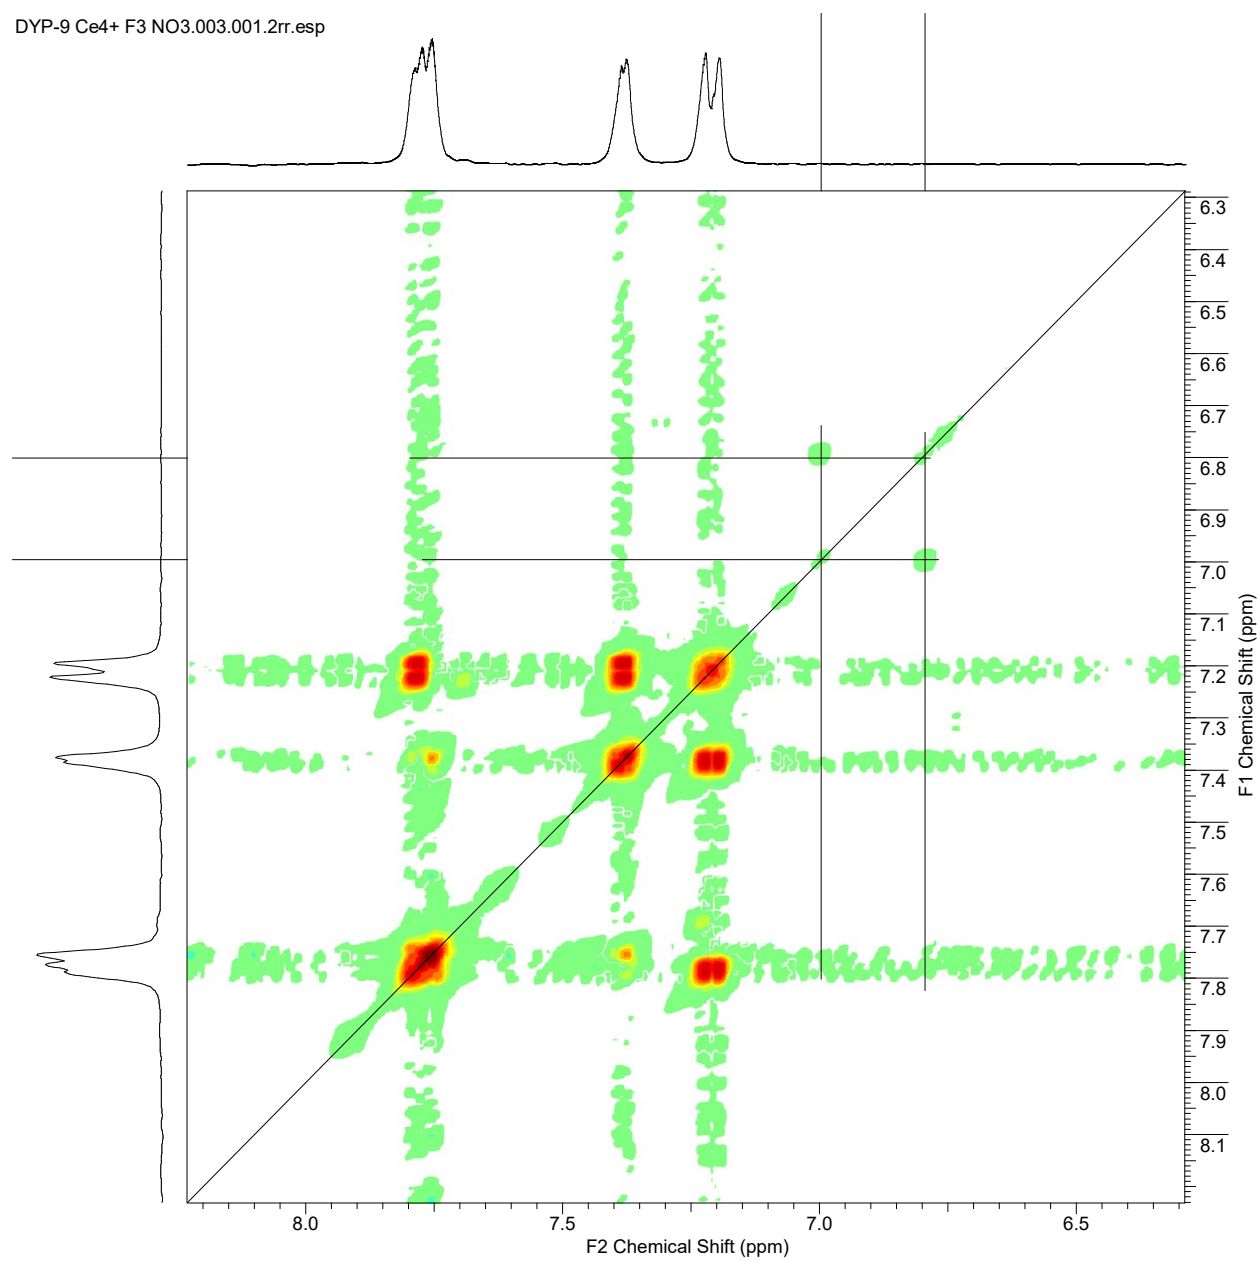

**Figure S12.**  $^1\text{H}$ - $^1\text{H}$  COSY  $\text{Ce}^{4+}$  (600.13MHz for  $^1\text{H}$ , F-3 with  $\text{DMSO-}d_6$ , capillary, 303K).

DYP-9 Th4+ F3 NO3.003.001.2rr.esp

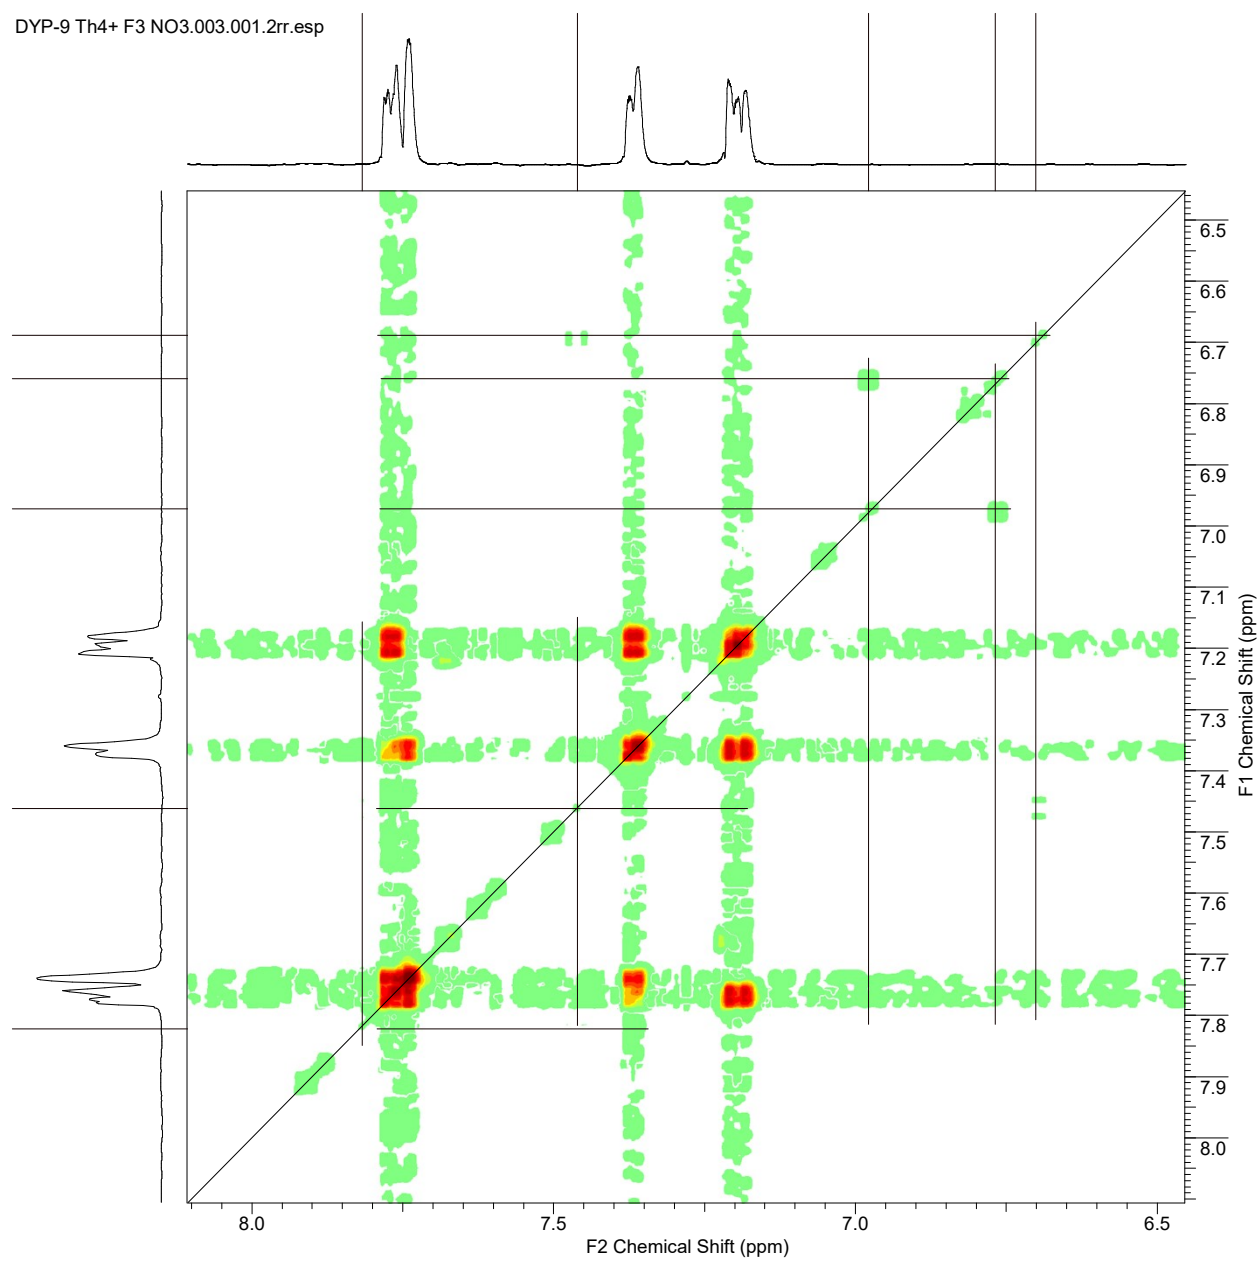

**Figure S13.**  $^1\text{H}$ - $^1\text{H}$  COSY  $\text{Th}^{4+}$  (600.13MHz for  $^1\text{H}$ , F-3 with  $\text{DMSO-}d_6$ , capillary, 303K).



DYP-9 U4+ F3 NO3.002.001.2rr.esp

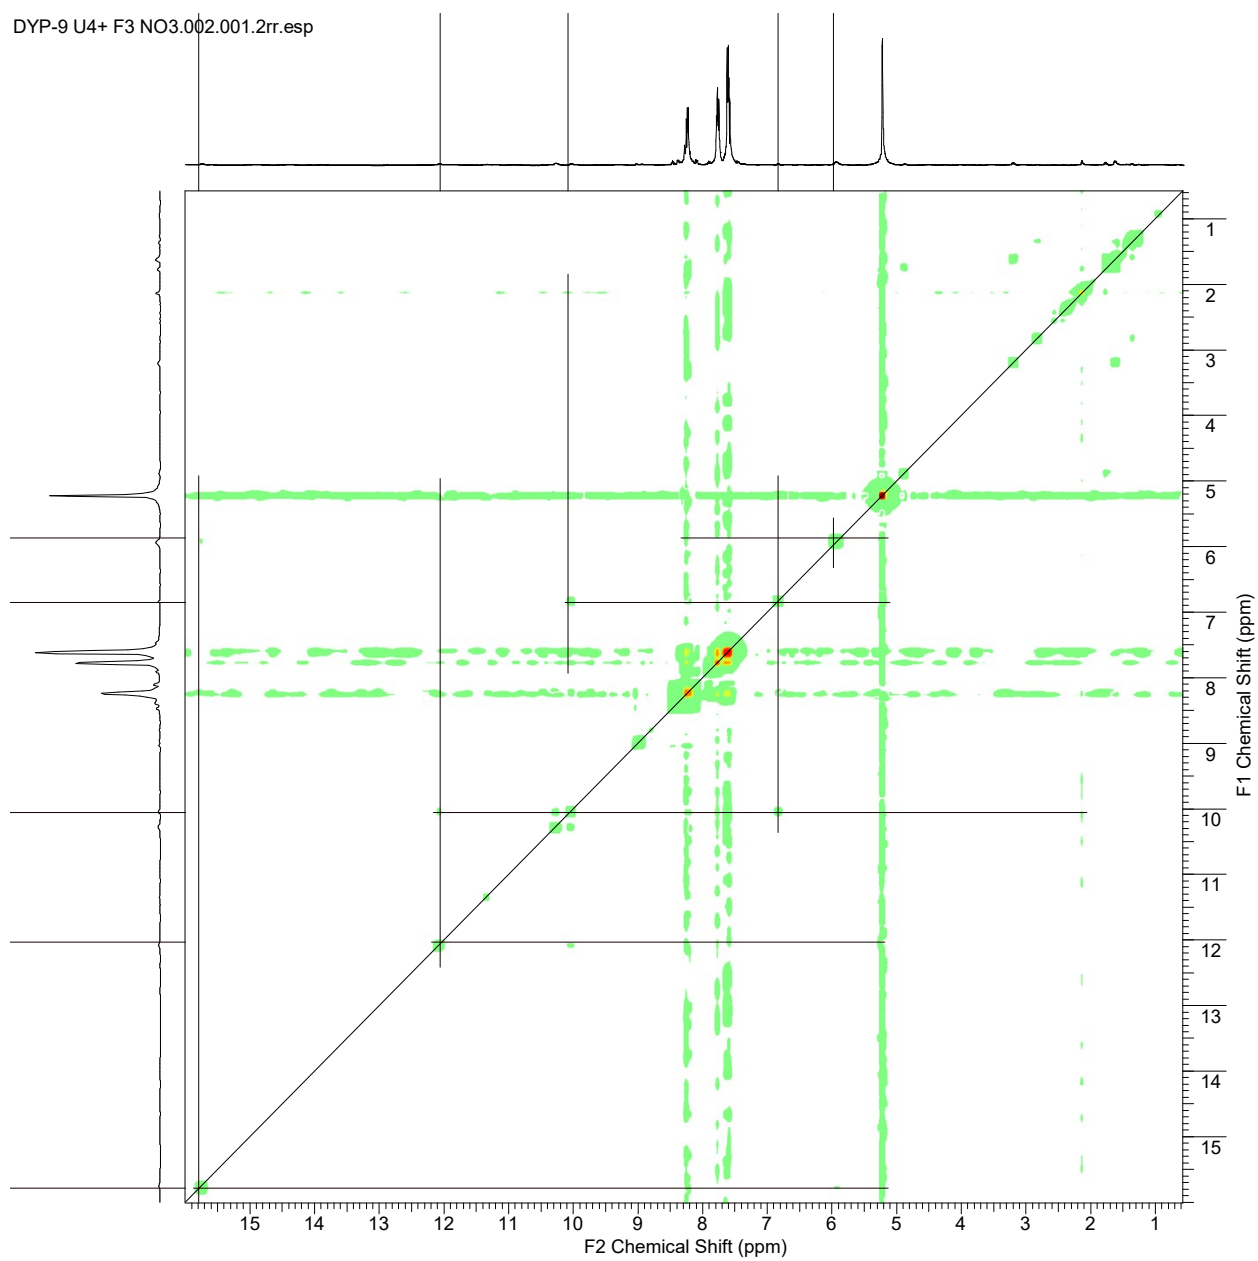

**Figure S15.**  $^1\text{H}$ - $^1\text{H}$  COSY  $\text{U}^{4+}$  (600.13MHz for  $^1\text{H}$ , F-3 with  $\text{DMSO-}d_6$ , capillary, 303K).

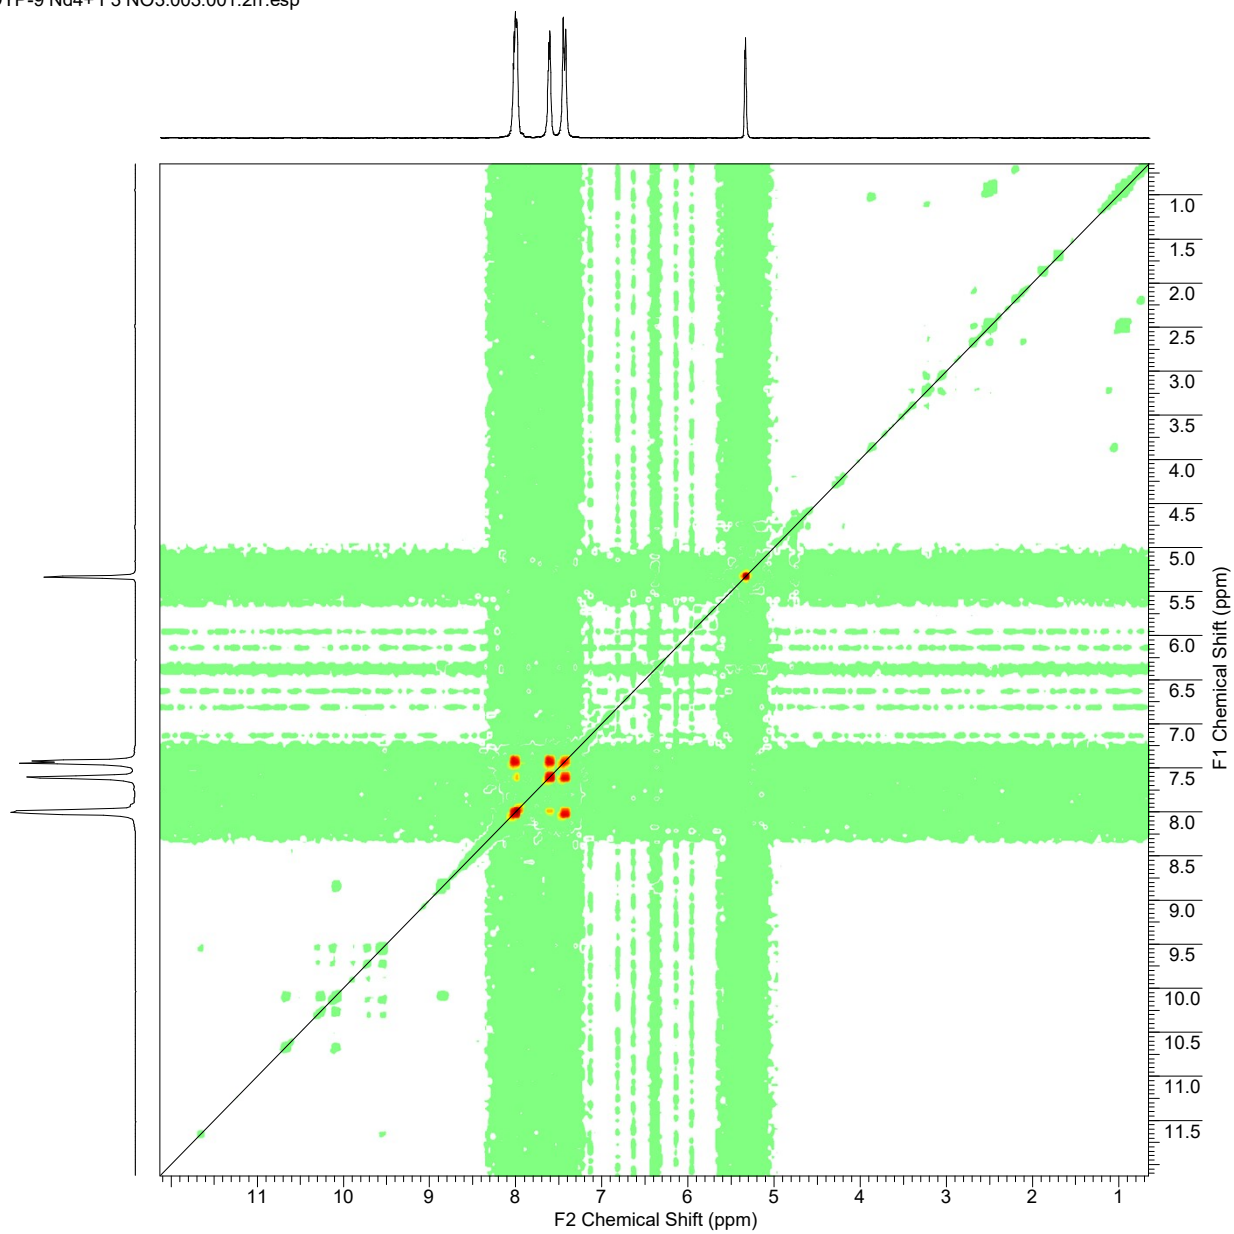

**Figure S16.**  $^1\text{H}$ - $^1\text{H}$  COSY  $\text{Nd}^{4+}$  (600.13MHz for  $^1\text{H}$ , F-3 with  $\text{DMSO-}d_6$ , capillary, 303K).

DYP-9 Nd4+ F3 NO3.003.001.2rr.esp

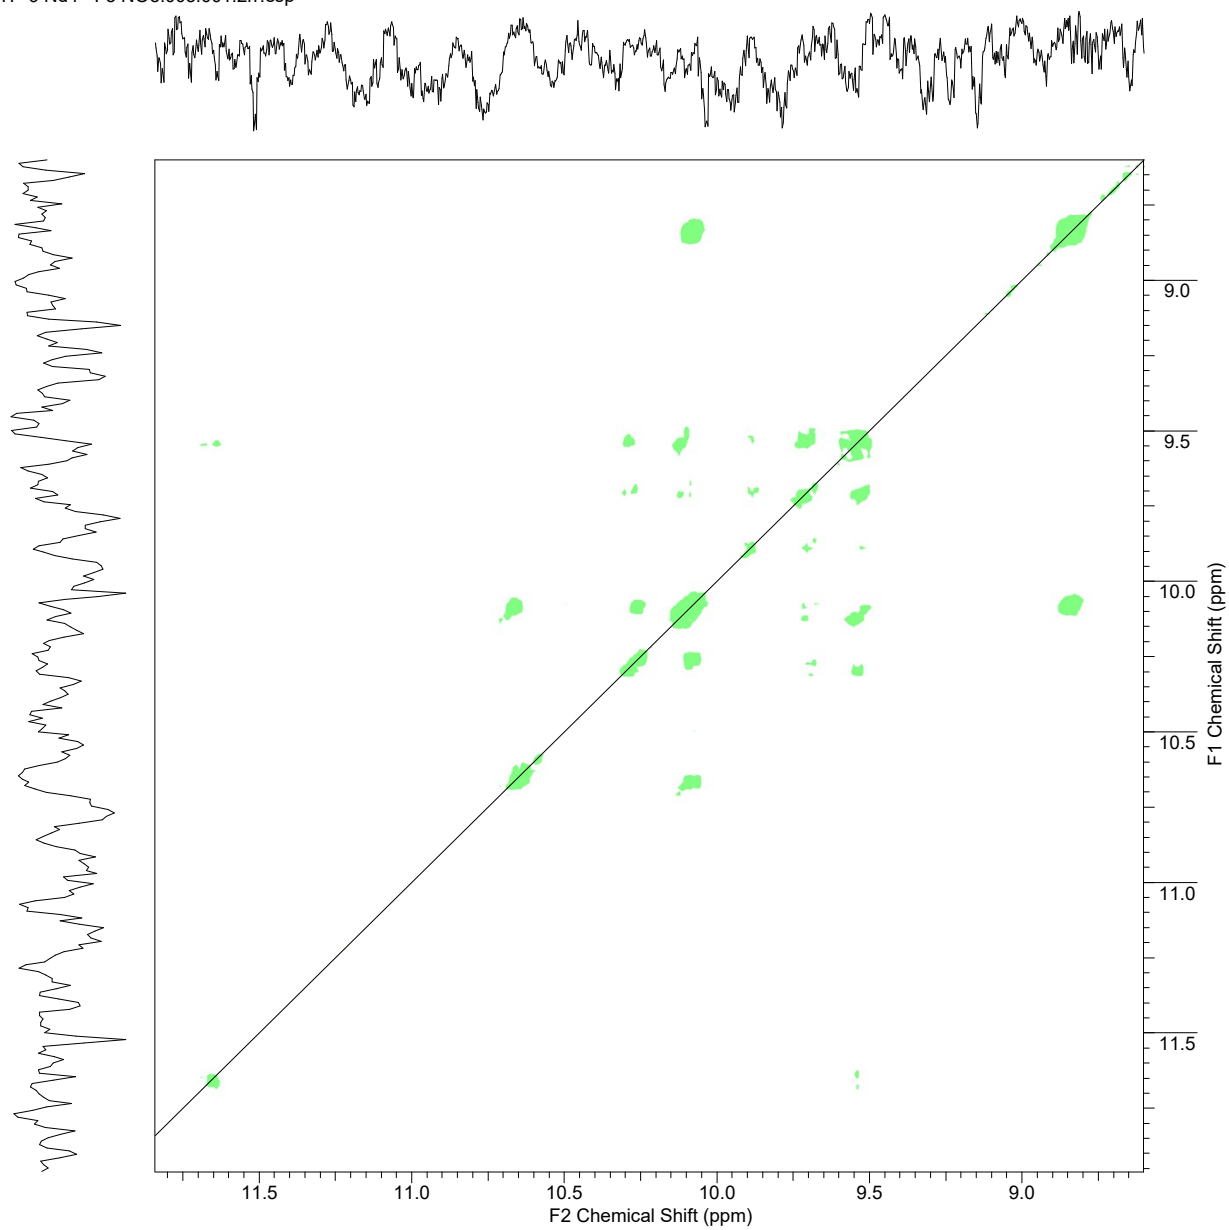

**Figure S17.**  $^1\text{H}$ - $^1\text{H}$  COSY  $\text{Nd}^{4+}$  (600.13MHz for  $^1\text{H}$ , F-3 with  $\text{DMSO-}d_6$ , capillary, 303K) 8 – 12 ppm region.

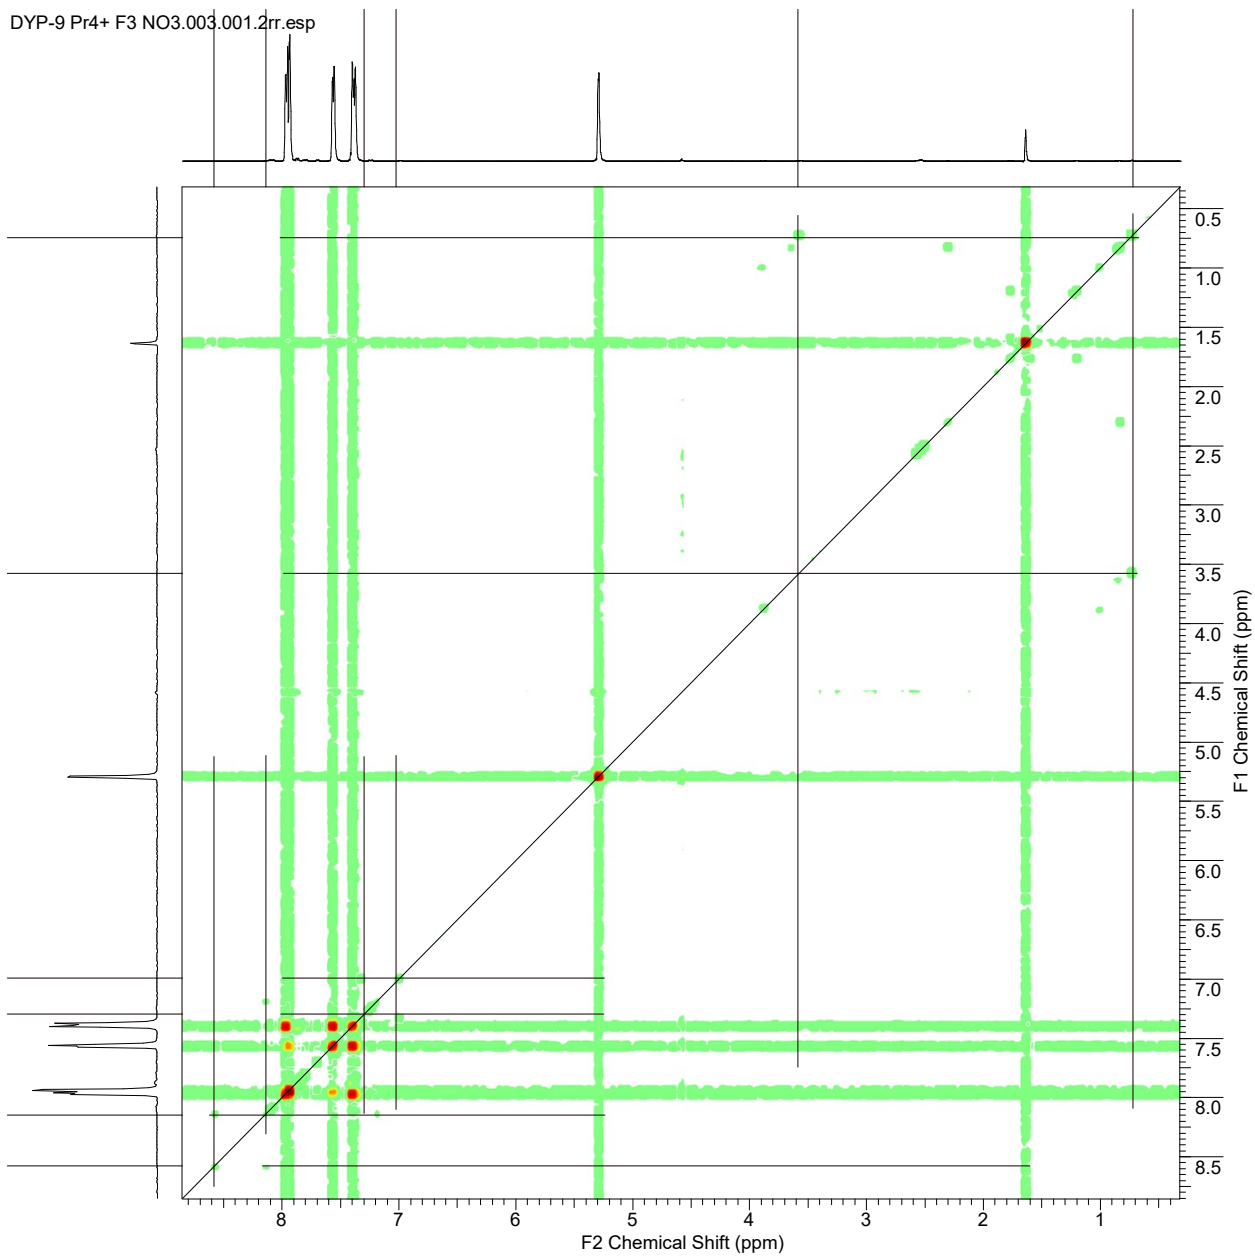

**Figure S18.**  $^1\text{H}$ - $^1\text{H}$  COSY  $\text{Pu}^{4+}$  (600.13MHz for  $^1\text{H}$ , F-3 with  $\text{DMSO-}d_6$ , capillary, 303K).

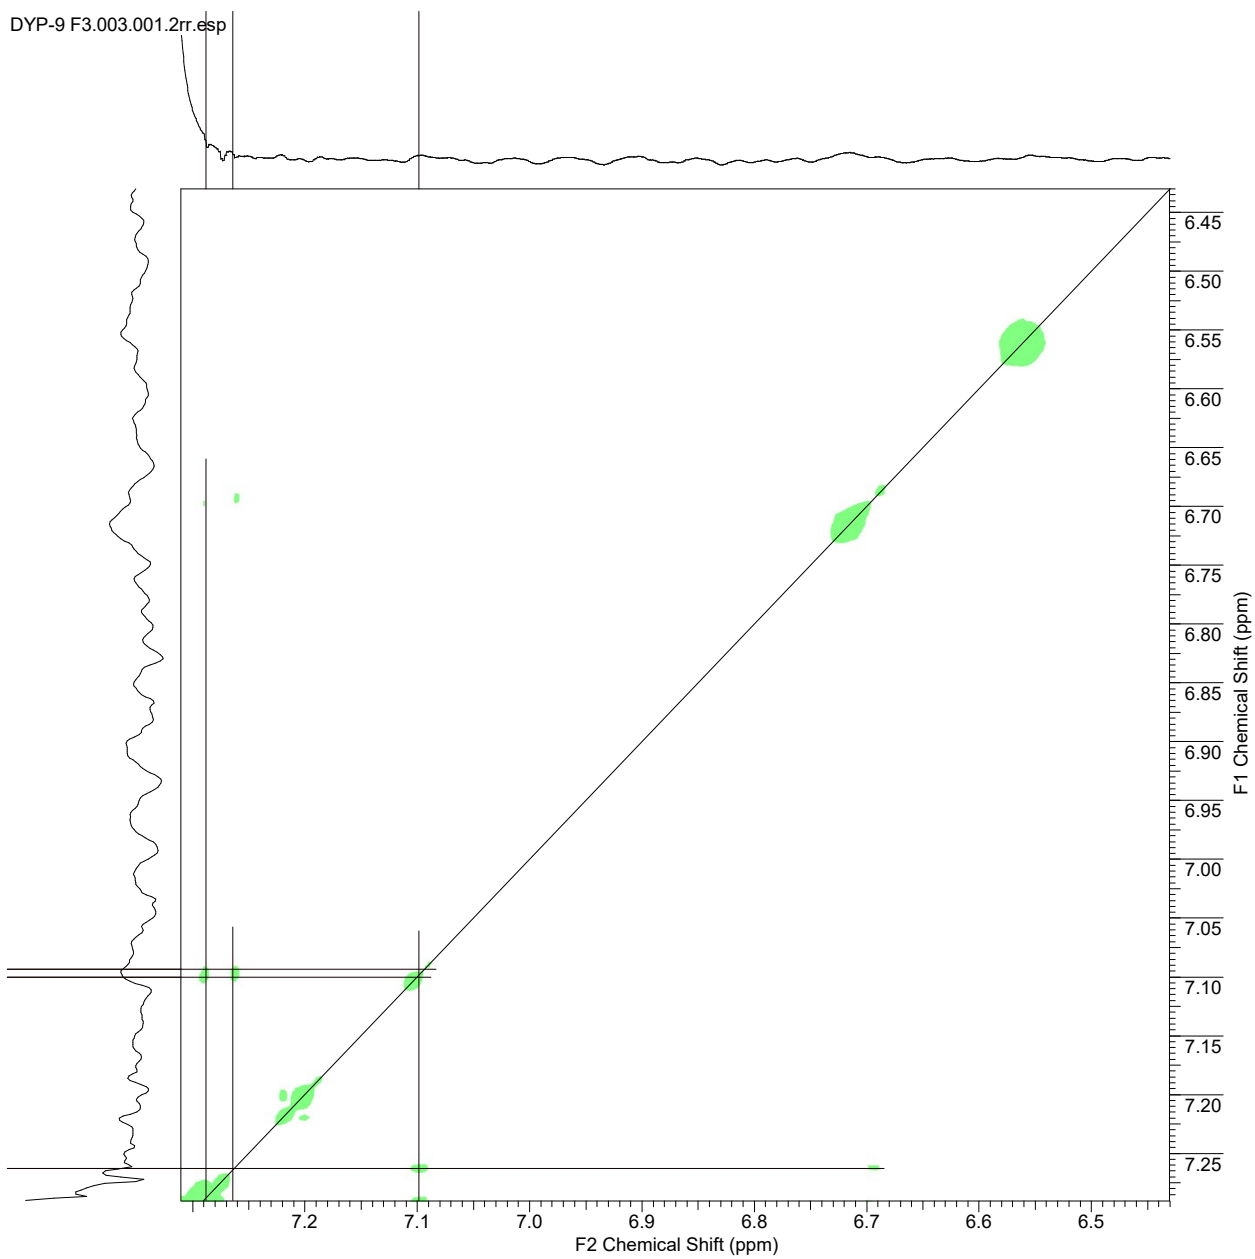

**Figure S19.**  $^1\text{H}$ - $^1\text{H}$  COSY  $^4\text{EtDABipy}$  (600.13MHz for  $^1\text{H}$ , F-3 with  $\text{DMSO-}d_6$ , capillary, 303K).

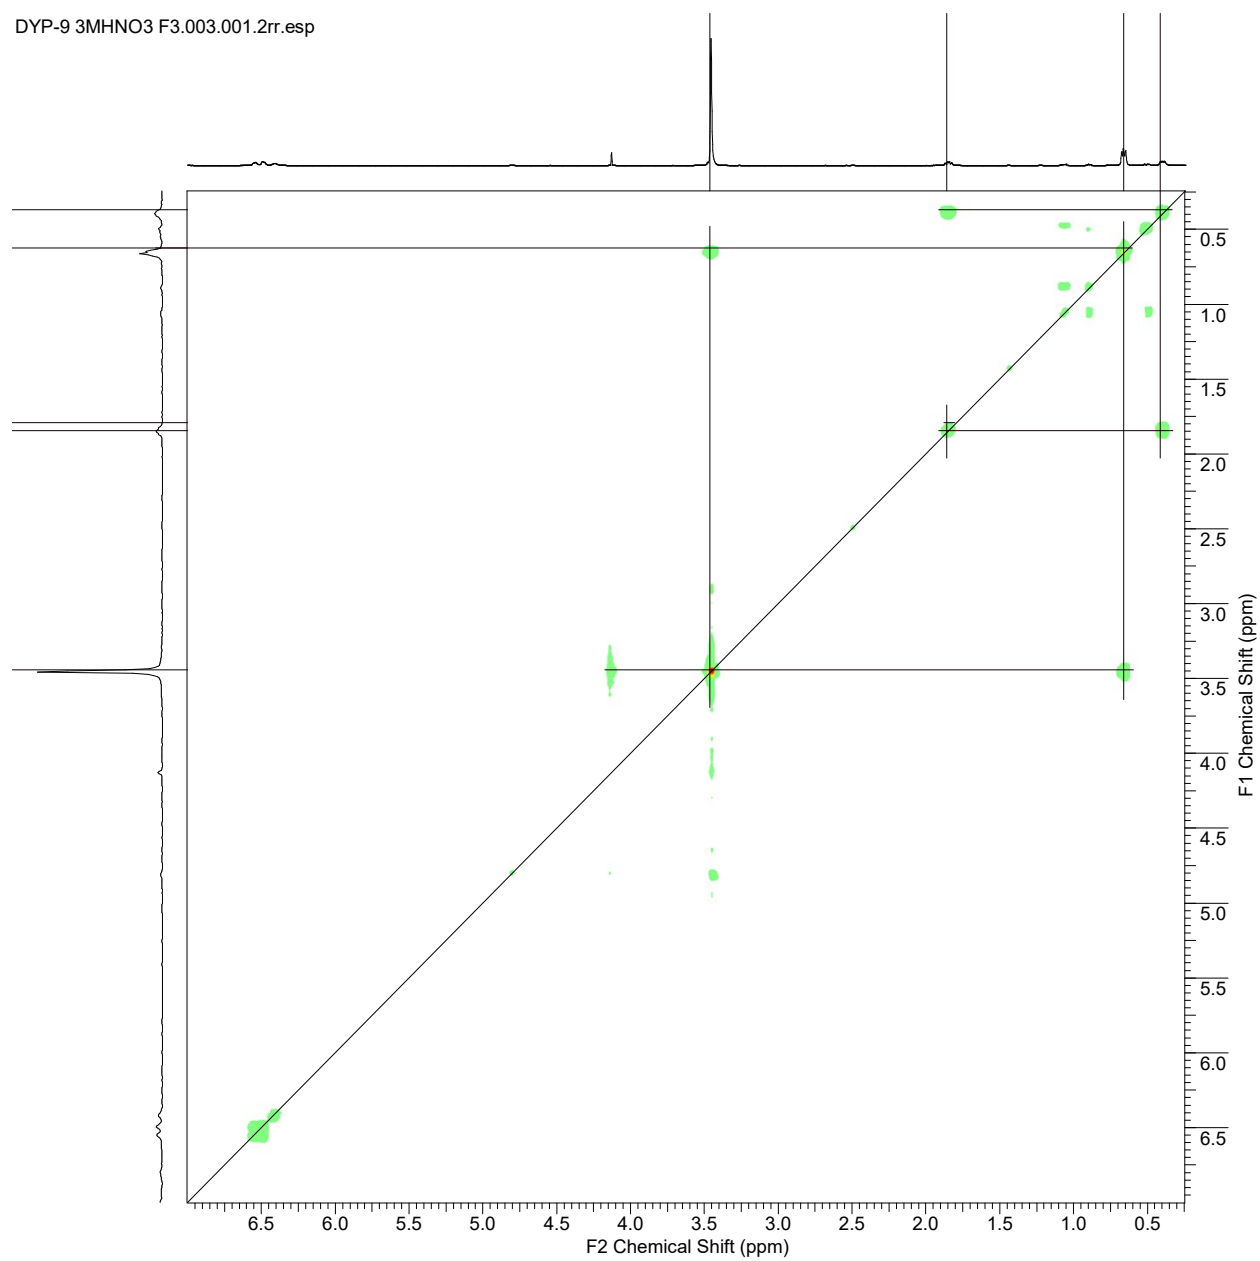

**Figure S20.**  $^1\text{H}$ - $^1\text{H}$  COSY  $^4\text{EtDABipy}$  in F-3 after contact with 3 M  $\text{HNO}_3$  (600.13MHz for  $^1\text{H}$ , F-3 with  $\text{DMSO-}d_6$ , capillary, 303K).

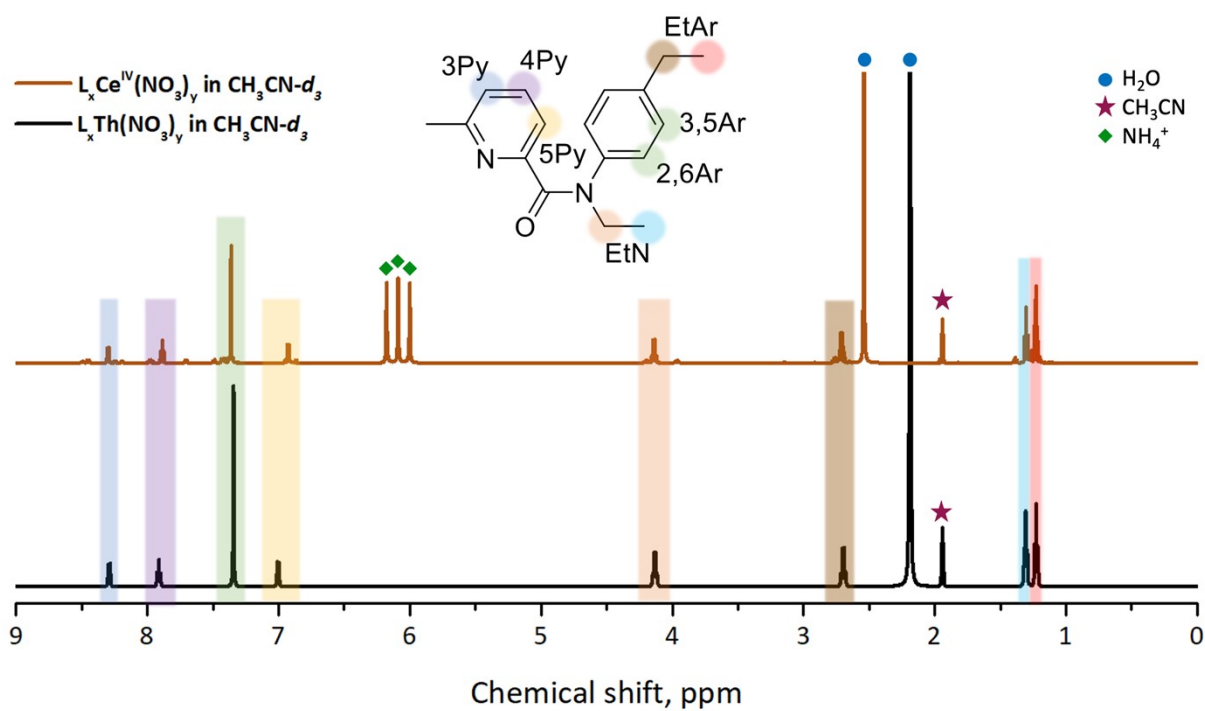

**Figure S21.**  $^1H$ -NMR spectra of Th(IV) and Ce(IV) complexes with  $^{4Et}DABipy$  (L) (600.13MHz for  $^1H$ ,  $CH_3CN-d_3$ , 303K). Insertion shows labelling of  $^{4Et}DABipy$  protons.

## 6 Solvent extraction

**Table S9.** D of M(IV) (M = Ce, Th, U, Np, Pu), Ce(III) and U(VI) as a function of C(HNO<sub>3</sub>). C(<sup>4</sup>EtDABipy) = 0.05 M in F-3.

| C(HNO <sub>3</sub> ), M | Ce   | Th    | Th    | U     | Np    | Pu  | Ce(III) | U(VI) |
|-------------------------|------|-------|-------|-------|-------|-----|---------|-------|
| 0.5                     | 0.02 | 2.1   | 2.1   | 4.1   | 3.4   | 0.1 | 0.04    | 2.3   |
| 0.7                     | 0.02 | 3.6   | 3.6   | 8.8   | 7.1   | 0.3 | 0.30    | –     |
| 1                       | 0.06 | 18.7  | 18.7  | 17.9  | 19.4  | 0.5 | 0.09    | 7.3   |
| 2                       | 0.09 | 254   | 254   | 662   | 88.9  | 9.2 | 0.23    | 54    |
| 3                       | 0.42 | 1753  | 1753  | 4949  | 218.1 | 159 | 0.46    | 155   |
| 5                       | 0.54 | 13145 | 13145 | 13992 | 540   | 164 | 0.45    | 4161  |

**Table S10.** D as a function of C(<sup>4</sup>EtDABipy) for An(IV). C(HNO<sub>3</sub>) = 3 M.

| C( <sup>4</sup> EtDABipy), M | Ce     | Th   | U    | Np    | Pu   |
|------------------------------|--------|------|------|-------|------|
| 0.0025                       | < 0.01 | 187  | 317  | 28.8  | 42.4 |
| 0.005                        | 0.02   | 338  | 685  | 38.7  | 68.5 |
| 0.0075                       | 0.03   | 400  | 1081 | 57.3  | 75.9 |
| 0.01                         | 0.04   | 740  | 1464 | 66.7  | 143  |
| 0.05                         | 0.41   | 3270 | 5100 | 218.1 | 520  |

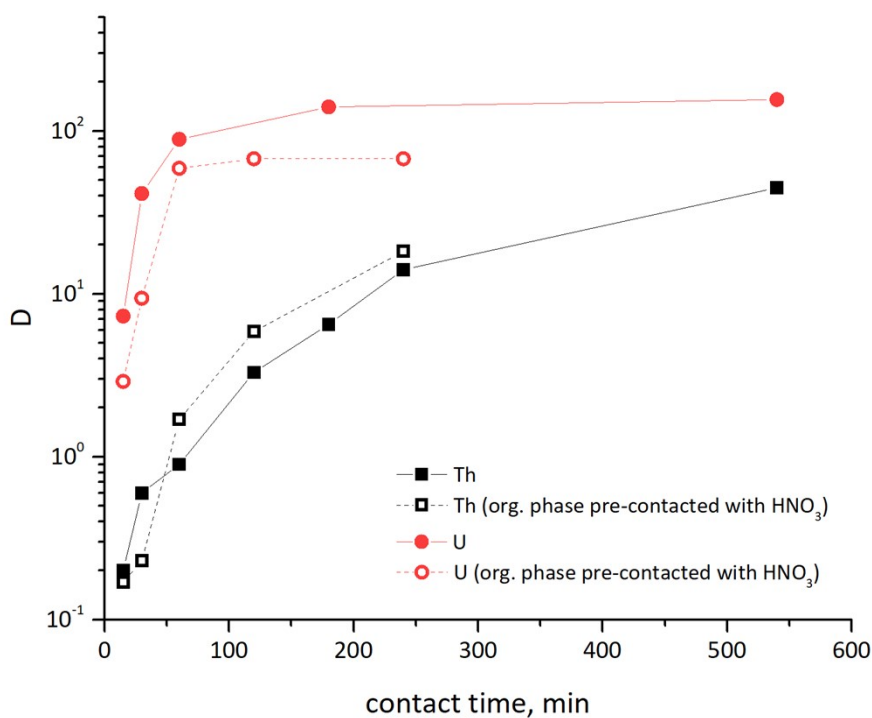

**Figure S22.** Contact times with pre-equilibrated organic phase.

## 7 References

- 1 M. Y. Alyapyshev, V. A. Babain, L. I. Tkachenko, A. Paulenova, A. A. Popova and N. E. Borisova, New Diamides of 2,2'-dipyridyl-6,6'-dicarboxylic Acid for Actinide-Lanthanide Separation, *Solvent Extraction and Ion Exchange*, 2014, **32**, 138–152.
- 2 G. M. Sheldrick, SHELXT - Integrated space-group and crystal-structure determination, *Acta Crystallogr. A*, 2015, **71**, 3–8.
- 3 G. M. Sheldrick, Crystal structure refinement with SHELXL, *Acta Crystallogr. C Struct. Chem.*, 2015, **71**, 3–8.
- 4 O. V. Dolomanov, L. J. Bourhis, R. J. Gildea, J. A. K. Howard and H. Puschmann, OLEX2: A complete structure solution, refinement and analysis program, *J. Appl. Crystallogr.*, 2009, **42**, 339–341.
- 5 M. Autillo, M. C. Illy, L. Briscese, M. A. Islam, H. Bolvin and C. Berthon, Paramagnetic Properties of  $[\text{An}^{\text{IV}}(\text{NO}_3)_6]^{2-}$  Complexes (An = U, Np, Pu) Probed by NMR Spectroscopy and Quantum Chemical Calculations, *Inorg. Chem.*, 2024, **63**, 12969–12980.
- 6 S. D. Reilly, J. Su, J. M. Keith, P. Yang, E. R. Batista, A. J. Gaunt, L. M. Harwood, M. J. Hudson, F. W. Lewis, B. L. Scott, C. A. Sharrad and D. M. Whittaker, Plutonium coordination and redox chemistry with the CyMe4-BTPPhen polydentate N-donor extractant ligand, *Chemical Communications*, 2018, **54**, 12582–12585.
- 7 F. H. Allen and I. J. Bruno, Bond lengths in organic and metal-organic compounds revisited: X—H bond lengths from neutron diffraction data, *Acta Crystallogr. B*, 2010, **66**, 380–386.
- 8 F. Neese, Software update: The ORCA program system—Version 5.0, *WIREs Computational Molecular Science*, 2022, **12**, 1606.
- 9 C. Adamo and V. Barone, Toward reliable density functional methods without adjustable parameters: The PBE0 model, *J. Chem. Phys.*, 1999, **110**, 6158–6170.
- 10 S. Grimme, J. Antony, S. Ehrlich and H. Krieg, A consistent and accurate ab initio parametrization of density functional dispersion correction (DFT-D) for the 94 elements H–Pu, *Journal of Chemical Physics*, 2010, **132**, 154104.
- 11 M. Barysz and A. J. Sadlej, Two-component methods of relativistic quantum chemistry: from the Douglas–Kroll approximation to the exact two-component formalism, *Journal of Molecular Structure: THEOCHEM*, 2001, **573**, 181–200.
- 12 M. Reiher, Relativistic Douglas–Kroll–Hess theory, *WIREs Computational Molecular Science*, 2012, **2**, 139–149.
- 13 A. Z. de Oliveira, C. T. Campos, F. E. Jorge, I. B. Ferreira and P. A. Fantin, All-electron triple zeta basis sets for the actinides, *Comput. Theor. Chem.*, 2018, **1135**, 28–33.
- 14 A. Z. de Oliveira, I. B. Ferreira, C. T. Campos, F. E. Jorge and P. A. Fantin, Segmented all-electron basis sets of triple zeta quality for the lanthanides: application to structure calculations of lanthanide monoxides, *J. Mol. Model.*, 2019, **25**, 38.
- 15 B. P. Pritchard, D. Altarawy, B. Didier, T. D. Gibson and T. L. Windus, New Basis Set Exchange: An Open, Up-to-Date Resource for the Molecular Sciences Community, *J. Chem. Inf. Model.*, 2019, **59**, 4814–4820.
- 16 F. E. Jorge, L. S. C. Martins and M. L. Franco, All-electron double zeta basis sets for the lanthanides: Application in atomic and molecular property calculations, *Chem. Phys. Lett.*, 2016, **643**, 84–88.

- 17 F. E. Jorge, A. Canal Neto, G. G. Camiletti and S. F. Machado, Contracted Gaussian basis sets for Douglas–Kroll–Hess calculations: Estimating scalar relativistic effects of some atomic and molecular properties, *J. Chem. Phys.*, 2009, **130**, 064108.
- 18 L. S. C. Martins, F. E. Jorge, M. L. Franco and I. B. Ferreira, All-electron Gaussian basis sets of double zeta quality for the actinides, *J. Chem. Phys.*, 2016, **145**, 244113.
- 19 X. Ren, P. Rinke, V. Blum, J. Wieferink, A. Tkatchenko, A. Sanfilippo, K. Reuter and M. Scheffler, Resolution-of-identity approach to Hartree-Fock, hybrid density functionals, RPA, MP2 and GW with numeric atom-centered orbital basis functions, *New J. Phys.*, 2012, **14**, 053020.
- 20 G. L. Stoychev, A. A. Auer and F. Neese, Automatic Generation of Auxiliary Basis Sets, *J. Chem. Theory Comput.*, 2017, **13**, 554–562.
- 21 R. F. W. Bader, A Quantum Theory of Molecular Structure and Its Applications, *Chem. Rev.*, 1991, **91**, 893–928.
- 22 E. Espinosa, I. Alkorta, J. Elguero and E. Molins, From weak to strong interactions: A comprehensive analysis of the topological and energetic properties of the electron density distribution involving X–H···F–Y systems, *J. Chem. Phys.*, 2002, **117**, 5529–5542.
- 23 R. F. W. Bader and T. T. Nguyen-Dang, in *Advances in Quantum Chemistry*, 1981, pp. 63–124.
- 24 N. Sadlej-Sosnowska, Transfer of electron density as a result of hydrogen bond formation, *Int. J. Quantum Chem.*, 2009, **109**, 294–300.
- 25 M. Solimannejad, M. Malekani and I. Alkorta, Cooperativity between the hydrogen bonding and halogen bonding in F 3 CX ... NCH(CNH) ... NCH(CNH) complexes (X=Cl, Br), *Mol. Phys.*, 2011, **109**, 1641–1648.
- 26 V. Tognetti and L. Joubert, Unraveling charge transfer processes with the quantum theory of atoms-in-molecules, *Theor. Chem. Acc.*, 2016, **135**, 124.
- 27 T. Lu and F. Chen, Multiwfn: A multifunctional wavefunction analyzer, *J. Comput. Chem.*, 2012, **33**, 580–592.
- 28 T. Lu, A comprehensive electron wavefunction analysis toolbox for chemists, Multiwfn, *Journal of Chemical Physics*, 2024, **161**, 082503.
- 29 K. B. Wiberg, Application of the pople-santry-segal CNDO method to the cyclopropylcarbinyl and cyclobutyl cation and to bicyclobutane, *Tetrahedron*, 1968, **24**, 1083–1096.
- 30 C. Trindle, Bond index description of delocalization, *J. Am. Chem. Soc.*, 1969, **91**, 219–220.
- 31 C. Trindle and O. Sinanoglu, Local orbital and bond index characterization of hybridization, *J. Am. Chem. Soc.*, 1969, **91**, 853–858.
- 32 A. E. Reed, R. B. Weinstock and F. Weinhold, Natural population analysis, *J. Chem. Phys.*, 1985, **83**, 735–746.
- 33 F. WEINHOLD and C. R. LANDIS, NATURAL BOND ORBITALS AND EXTENSIONS OF LOCALIZED BONDING CONCEPTS, *Chem. Educ. Res. Pract.*, 2001, **2**, 91–104.
- 34 E. D. Glendening, J. K. Badenhoop, A. E. Reed, J. E. Carpenter, J. A. Bohmann, C. M. Morales, P. Karafiloglou, C. R. Landis and F. Weinhold, NBO 7.0, *Theoretical Chemistry Institute, University of Wisconsin*, 2018, preprint.
